# Supplementary material for: Genome-wide identification of Tomato Golden 2-Like transcription factors and abiotic stress related members screening
Source: BMC Plant Biol. 2022 Feb 23;22:82. doi: 10.1186/s12870-022-03460-9 (PMC8864820; doi:10.1186/s12870-022-03460-9)
Supplement: Supplementary file 1 — Additional file 1. [file 12870_2022_3460_MOESM1_ESM.xlsx]

## Sheet: Sheet1
Table S1 Primers for qRT-PCR of SlGlks
Sequence	Forward primer	Reverse primer
qRT-PCR SlGlk3	ATTCGCAGACTCAACCAGCA	GAAGTACCTCCGCAACTCCC
qRT-PCR SlGlk61	ACTAGCCATGCACCATCACC	TCCGGCGAGCTATGAGAATG
qRT-PCR SlGlk16	GAATCCATCCACAACGCACG	AATCACCACTAAGCCCTCGC
qRT-PCR SlGlk38	GTATTTGGGAGGACGTGGCA	GGAGTCGGTGACGGGAATTT
qRT-PCR SlGlk36	TACCAGGCATACCACCCGTA	TCCTAGGGGAAGTGGTAGCC
qRT-PCR SlGlk55	TTTAGACCTTTCCGGTCGCC	TGTTGGCGATGGTTGTGGTA
qRT-PCR SlGlk45	GCCTCGTCTTAGGTGGACAA	TTGCTTCCCCATGCGGTATT
qRT-PCR SlGlk53	TACACAACTTGGTGGGGCAG	GATTGCTCTTGGGGCTTCCA
qRT-PCR SlGlk54	GCTGCTTGACCTCTCGTGAT	ATTGCAGTTCGTCTCTCGGG
qRT-PCR SlGlk64	ACCAGACATTTCAGCTGCCT	TGAGGATCGTTCACCCATGC
qRT-PCR SlGlk65	CCCAGATAAGGCTACGCCAA	TTGACTCTCTGCCACACATGA
Actin	GTCCTCTTCCAGCCATCCAT	ACCACTGAGCACAATGTTACCG
VIGS-SlGlk16	GTGAGTAAGGTTACCGAATTCCGGACCCAGTAAAGCTACTCCAAA	CGTGAGCTCGGTACCGGATCCTTCTCAGCTTCAACTTGGAGGTG
