# Supplementary material for: Genome-wide identification of Tomato Golden 2-Like transcription factors and abiotic stress related members screening
Source: BMC Plant Biol. 2022 Feb 23;22:82. doi: 10.1186/s12870-022-03460-9 (PMC8864820; doi:10.1186/s12870-022-03460-9)
Supplement: Supplementary file 2 — Additional file 2. [file 12870_2022_3460_MOESM2_ESM.xlsx]

## Sheet: Sheet1
Table S2 Physical properties of tomato G2-like proteins
Gene name	Genomic accession No.	Number of amino acids	Molecular weight	Aliphatic index	Theoretical PI	GRAVY	Instability index
SlGlk1	Solyc01g065540.2.1	677	74817.6	73.4	6.07	-0.596	46.22
SlGlk2	Solyc01g091810.1.1	578	65235.8	76.23	5.27	-0.579	49.15
SlGlk3	Solyc01g108300.2.1	405	45059.3	66.17	8.12	-0.817	59.85
SlGlk4	Solyc02g031820.1.1	354	41037.8	86.69	5.52	-0.565	48.49
SlGlk5	Solyc02g076670.2.1	338	39366.3	69.47	9.28	-0.949	53.63
SlGlk6	Solyc02g080710.1.1	359	40617	74.4	8.79	-0.557	42.23
SlGlk7	Solyc02g080720.1.1	326	37378.4	66.99	9.62	-0.703	41.3
SlGlk8	Solyc02g080730.1.1	270	30683.8	66.07	9.82	-0.616	33.02
SlGlk9	Solyc02g080740.1.1	277	31985.5	66.82	9.76	-0.529	39.75
SlGlk10	Solyc02g080860.1.1	253	28345.9	62.06	6.38	-0.621	52.4
SlGlk11	Solyc02g090400.2.1	371	41678.2	74.58	8.69	-0.742	44.9
SlGlk12	Solyc03g006150.2.1	307	35707.1	64.76	8.86	-0.931	40.22
SlGlk13	Solyc03g083340.1.1	560	63603	67.55	6.74	-0.796	43.69
SlGlk14	Solyc04g008050.2.1	654	71628.8	87.13	6.89	-0.29	57.09
SlGlk15	Solyc04g008480.1.1	297	34040.1	70.51	8.1	-0.813	53.79
SlGlk16	Solyc04g015290.2.1	319	34929.2	73.32	6	-0.549	47.17
SlGlk17	Solyc04g050070.1.1	354	39278.4	71.05	6.42	-0.455	51.88
SlGlk18	Solyc04g051080.1.1	542	61680.3	73.71	5.73	-0.761	44.58
SlGlk19	Solyc04g079600.2.1	308	34626.9	71.56	7.28	-0.541	41.73
SlGlk20	Solyc05g007890.2.1	339	38069.9	76.49	7.15	-0.762	49.19
SlGlk21	Solyc05g009720.2.1	400	44023.2	55.85	6.53	-0.971	57.87
SlGlk22	Solyc05g014260.2.1	581	65467.1	78.07	6.16	-0.521	38.23
SlGlk23	Solyc05g051060.2.1	284	32151.8	68.31	8.37	-0.697	55.08
SlGlk24	Solyc05g054390.2.1	663	73388.6	76.71	5.72	-0.529	51.05
SlGlk25	Solyc05g055940.2.1	414	45922.2	67.83	6.1	-0.69	51.49
SlGlk26	Solyc06g005680.2.1	266	29543.9	64.14	5.61	-0.77	45.06
SlGlk27	Solyc06g008200.2.1	476	51755.4	72.14	4.99	-0.552	51.57
SlGlk28	Solyc06g051060.2.1	254	28895.9	59.88	9.3	-1.003	59.22
SlGlk29	Solyc06g061030.2.1	559	62309.3	71.34	6.19	-0.602	51.81
SlGlk30	Solyc06g066180.2.1	183	20394.3	76.17	9.79	-0.572	37.84
SlGlk31	Solyc06g066340.2.1	291	32608.6	64.67	9	-0.748	49.03
SlGlk32	Solyc06g076350.2.1	322	36183.4	65.37	5.46	-0.679	52.45
SlGlk33	Solyc07g005140.2.1	665	73325.8	71.4	6.77	-0.666	46.7
SlGlk34	Solyc07g009110.1.1	578	65564.1	76.57	4.83	-0.57	45.16
SlGlk35	Solyc07g019550.1.1	367	41972.8	85.45	6.51	-0.441	52.91
SlGlk36	Solyc07g053630.2.1	543	60045.2	74.84	7.4	-0.489	53.91
SlGlk37	Solyc08g005260.1.1	361	40648	64.54	7.33	-0.78	56.8
SlGlk38	Solyc08g076010.2.1	361	40859.8	72.44	6.43	-0.624	48.21
SlGlk39	Solyc08g076400.2.1	263	29612.3	67.45	9.22	-0.608	50.98
SlGlk40	Solyc08g077230.2.1	560	62475.2	71.89	5.91	-0.639	50.4
SlGlk41	Solyc09g005030.1.1	409	45914	72.98	9.43	-0.638	50.33
SlGlk42	Solyc09g005370.1.1	316	35745.6	78.35	8.24	-0.489	47.82
SlGlk43	Solyc09g010340.1.1	423	48232.8	75.84	5.34	-0.664	33.03
SlGlk44	Solyc09g072830.2.1	450	49380.1	72.64	4.98	-0.572	60.13
SlGlk45	Solyc09g091880.2.1	289	32265.6	81.63	5.8	-0.51	56.3
SlGlk46	Solyc10g008160.2.1	192	20937.2	83.39	10.07	-0.295	47.41
SlGlk47	Solyc10g050420.1.1	416	47935.5	73.49	9.06	-0.753	45.4
SlGlk48	Solyc10g076460.1.1	302	34157.4	75.86	6.64	-0.718	56.04
SlGlk49	Solyc10g078310.1.1	290	31879.7	65.17	6.45	-0.606	55.97
SlGlk50	Solyc10g078720.1.1	402	45312.1	59.7	5.96	-0.774	56.65
SlGlk51	Solyc10g080460.1.1	374	42389.5	72.49	5.87	-0.649	60.6
SlGlk52	Solyc10g080960.1.1	266	29196	70.41	8.08	-0.466	52.95
SlGlk53	Solyc10g083340.1.1	409	45930.4	74.69	6.47	-0.757	42.29
SlGlk54	Solyc10g085620.1.1	400	45046.4	70.95	6.68	-0.759	54.02
SlGlk55	Solyc11g011770.1.1	462	51751.1	60.35	7.08	-0.85	62.89
SlGlk56	Solyc11g022470.1.1	303	33230.8	73.33	6.16	-0.81	52.85
SlGlk57	Solyc11g066170.1.1	363	41476.4	81.1	6.49	-0.652	48.09
SlGlk58	Solyc11g066230.1.1	348	39989.8	90.43	5.62	-0.501	45.37
SlGlk59	Solyc11g067280.1.1	294	32071.7	70.58	6.18	-0.742	53.25
SlGlk60	Solyc12g006280.1.1	174	20316.2	69.43	9.37	-0.874	53.35
SlGlk61	Solyc12g006800.1.1	439	48722	63.37	6.66	-0.861	63.18
SlGlk62	Solyc12g008800.1.1	297	32717.2	69.56	8.97	-0.66	38.25
SlGlk63	Solyc12g010330.1.1	708	77633.4	70.1	5.82	-0.608	40.29
SlGlk64	Solyc12g017370.1.1	351	39443.4	62.51	7.78	-0.772	47.43
SlGlk65	Solyc12g098370.1.1	302	33100.3	78.15	6.26	-0.467	51.58
SlGlk66	Solyc12g099380.1.1	555	62780.3	69.57	5.34	-0.6	52.78
