# Supplementary material for: Genome-wide identification of Tomato Golden 2-Like transcription factors and abiotic stress related members screening
Source: BMC Plant Biol. 2022 Feb 23;22:82. doi: 10.1186/s12870-022-03460-9 (PMC8864820; doi:10.1186/s12870-022-03460-9)
Supplement: Supplementary file 3 — Additional file 3. [file 12870_2022_3460_MOESM3_ESM.xlsx]

## Sheet: Sheet4
Table S3 Two main conserved domains of tomato G2-like proteins
Subgroup	Gene	Type of PELHRR	Type of VI/NASHLQ
I	SlGlk7	HDIHRR	IKSHLQ
	SlGlk9	HDLHCR	IKSHLQ
	SlGlk6	HDLHRR	IKSHLQ
	SlGlk8	DDLHRR	IKSHLQ
	SlGlk10	HDLHRC	VKSHLQ
	SlGlk15	PDLHHC	VKSHLQ
	SlGlk60	PQLHHL	VKSHLQ
	SlGlk5	PDLHRS	VKSHLQ
	SlGlk12	PELHLS	VKSHLQ
	SlGlk28	PELHLR	VKSHLQ
	SlGlk41	PELHLR	VKSHLQ
	SlGlk48	PDLHRR	VKSHLQ
Ⅱ	SlGlk23	TSLHAR	VKSHLQ
	SlGlk55	STLHAR	VKSHLQ
	SlGlk19	STLHAH	VKSHLQ
	SlGlk31	SSLHAR	VKSHLQ
	SlGlk37	STLHAR	VKSHLQ
	SlGlk39	STLHAH	VKSHLQ
Ⅲ	SlGlk3	PELHRR	VKSHLQ
	SlGlk11	PELHRR	VKSHLQ
	SlGlk61	PDLHRR	VKSHLQ
	SlGlk21	PELHRR	VKSHLQ
Ⅳ	SlGlk17	PELHKV	VKSHLQ
	SlGlk25	PELHEV	VKSHLQ
	SlGlk27	PELHEA	VKSHLQ
	SlGlk44	PELHEA	VKSHLQ
	SlGlk51	EDLHDR	VKSHLQ
	SlGlk50	QDLHDR	VKSHLQ
	SlGlk59	NELHER	VKSHLQ
	SlGlk56	HELHER	VKSHLQ
	SlGlk42	QELHDL	VKSHLQ
	SlGlk53	PDLHER	LKSHLQ
	SlGlk54	PDLHER	LKSHLQ
	SlGlk30	ADLHQQ	LKSHLQ
	SlGlk38	ADLHDR	LKSHLQ
	SlGlk45	TELHER	LKSHLQ
	SlGlk65	AELHER	LKSHLQ
	SlGlk16	ADLHER	LKSHLQ
	SlGlk20	PDLHQR	LKSHLQ
	SlGlk64	VELHER	LKSHLQ
Ⅴ	SlGlk57	TELDKK	VTYRLK
	SlGlk4	AELEKK	LTYRLK
	SlGlk58	AELEKK	LTYRLK
	SlGlk2	PKMHQS	VASHLQ
	SlGlk35	DPLHNK	VASHLQ
	SlGlk1	VELHQQ	VASHLQ
	SlGlk24	VELHQQ	VASHLQ
	SlGlk14	VELHQQ	VASHLQ
	SlGlk22	VDLHQK	VARHLQ
	SlGlk66	AELHRK	VASHLQ
	SlGlk33	IELHRK	VASHLQ
	SlGlk63	IELHKK	VASHLQ
	SlGlk29	PELHKK	IASHLQ
	SlGlk40	PELHKK	VASHLQ
	SlGlk36	PELHRR	IASHLQ
	SlGlk46	-	IASHLQ
	SlGlk32	PQLHKR	IASHLQ
	SlGlk26	PQLHKR	VASHLQ
	SlGlk52	PQLHKR	VASHLQ
	SlGlk49	PQLHKR	VASHLQ
	SlGlk62	EEEHRR	VASHLQ
	SlGlk18	KVVHQI	VASHLQ
	SlGlk34	DDLHSK	IASHLQ
	SlGlk47	ANLHAK	VASHLQ
	SlGlk13	KDLHAA	VASHLQ
	SlGlk43	PQLHDK	VASHLQ
