# Supplementary material for: Genome-wide identification of Tomato Golden 2-Like transcription factors and abiotic stress related members screening
Source: BMC Plant Biol. 2022 Feb 23;22:82. doi: 10.1186/s12870-022-03460-9 (PMC8864820; doi:10.1186/s12870-022-03460-9)
Supplement: Supplementary file 5 — Additional file 5. [file 12870_2022_3460_MOESM5_ESM.xlsx]

## Sheet: Sheet1
	Table S5 The Conserved Domian of SlGlKs
Gene Name	Genomic Accession No.	From	To	Short name
SlGlk2	mRNA:Solyc01g091810.1.1	193	245	myb_SHAQKYF
SlGlk2	mRNA:Solyc01g091810.1.1	17	98	REC superfamily
SlGlk1	mRNA:Solyc01g065540.2.1	31	145	REC_typeB_ARR-like
SlGlk1	mRNA:Solyc01g065540.2.1	211	264	myb_SHAQKYF
SlGlk3	mRNA:Solyc01g108300.2.1	261	317	myb_SHAQKYF
SlGlk7	mRNA:Solyc02g080720.1.1	40	95	myb_SHAQKYF
SlGlk11	mRNA:Solyc02g090400.2.1	237	293	myb_SHAQKYF
SlGlk5	mRNA:Solyc02g076670.2.1	60	115	myb_SHAQKYF
SlGlk9	mRNA:Solyc02g080740.1.1	40	95	myb_SHAQKYF
SlGlk6	mRNA:Solyc02g080710.1.1	100	153	myb_SHAQKYF
SlGlk4	mRNA:Solyc02g031820.1.1	20	117	REC superfamily
SlGlk4	mRNA:Solyc02g031820.1.1	167	277	PLN03162 superfamily
SlGlk8	mRNA:Solyc02g080730.1.1	25	78	myb_SHAQKYF
SlGlk10	mRNA:Solyc02g080860.1.1	43	98	myb_SHAQKYF
SlGlk13	mRNA:Solyc03g083340.1.1	14	127	REC superfamily
SlGlk13	mRNA:Solyc03g083340.1.1	186	326	PLN03162 superfamily
SlGlk12	mRNA:Solyc03g006150.2.1	60	115	myb_SHAQKYF
SlGlk19	mRNA:Solyc04g079600.2.1	125	178	myb_SHAQKYF
SlGlk17	mRNA:Solyc04g050070.1.1	228	282	myb_SHAQKYF
SlGlk18	mRNA:Solyc04g051080.1.1	14	126	REC superfamily
SlGlk18	mRNA:Solyc04g051080.1.1	198	335	PLN03162 superfamily
SlGlk14	mRNA:Solyc04g008050.2.1	40	142	REC_typeB_ARR-like
SlGlk14	mRNA:Solyc04g008050.2.1	211	264	myb_SHAQKYF
SlGlk15	mRNA:Solyc04g008480.1.1	19	74	myb_SHAQKYF
SlGlk16	mRNA:Solyc04g015290.2.1	42	98	myb_SHAQKYF
SlGlk16	mRNA:Solyc04g015290.2.1	139	185	Myb_CC_LHEQLE
SlGlk20	mRNA:Solyc05g007890.2.1	22	78	myb_SHAQKYF
SlGlk20	mRNA:Solyc05g007890.2.1	149	196	Myb_CC_LHEQLE
SlGlk25	mRNA:Solyc05g055940.2.1	338	381	Myb_CC_LHEQLE
SlGlk25	mRNA:Solyc05g055940.2.1	253	307	myb_SHAQKYF
SlGlk23	mRNA:Solyc05g051060.2.1	113	166	myb_SHAQKYF
SlGlk22	mRNA:Solyc05g014260.2.1	24	138	REC_typeB_ARR-like
SlGlk22	mRNA:Solyc05g014260.2.1	198	251	myb_SHAQKYF
SlGlk21	mRNA:Solyc05g009720.2.1	220	276	myb_SHAQKYF
SlGlk24	mRNA:Solyc05g054390.2.1	39	153	REC_typeB_ARR-like
SlGlk24	mRNA:Solyc05g054390.2.1	219	272	myb_SHAQKYF
SlGlk29	mRNA:Solyc06g061030.2.1	285	548	PLN03162 superfamily
SlGlk29	mRNA:Solyc06g061030.2.1	20	132	REC superfamily
SlGlk27	mRNA:Solyc06g008200.2.1	348	395	Myb_CC_LHEQLE
SlGlk27	mRNA:Solyc06g008200.2.1	263	317	myb_SHAQKYF
SlGlk30	mRNA:Solyc06g066180.2.1	18	74	myb_SHAQKYF
SlGlk30	mRNA:Solyc06g066180.2.1	117	151	Myb_CC_LHEQLE
SlGlk28	mRNA:Solyc06g051060.2.1	70	125	myb_SHAQKYF
SlGlk32	mRNA:Solyc06g076350.2.1	150	203	myb_SHAQKYF
SlGlk26	mRNA:Solyc06g005680.2.1	146	199	myb_SHAQKYF
SlGlk31	mRNA:Solyc06g066340.2.1	103	156	myb_SHAQKYF
SlGlk33	mRNA:Solyc07g005140.2.1	28	142	REC_typeB_ARR-like
SlGlk33	mRNA:Solyc07g005140.2.1	210	263	myb_SHAQKYF
SlGlk36	mRNA:Solyc07g053630.2.1	191	542	PLN03162 superfamily
SlGlk35	mRNA:Solyc07g019550.1.1	15	128	REC superfamily
SlGlk35	mRNA:Solyc07g019550.1.1	190	242	myb_SHAQKYF
SlGlk34	mRNA:Solyc07g009110.1.1	19	132	REC superfamily
SlGlk34	mRNA:Solyc07g009110.1.1	192	245	myb_SHAQKYF
SlGlk38	mRNA:Solyc08g076010.2.1	205	251	Myb_CC_LHEQLE
SlGlk38	mRNA:Solyc08g076010.2.1	105	161	myb_SHAQKYF
SlGlk40	mRNA:Solyc08g077230.2.1	273	550	PLN03162 superfamily
SlGlk40	mRNA:Solyc08g077230.2.1	20	132	REC superfamily
SlGlk37	mRNA:Solyc08g005260.1.1	177	230	myb_SHAQKYF
SlGlk39	mRNA:Solyc08g076400.2.1	169	222	myb_SHAQKYF
SlGlk43	mRNA:Solyc09g010340.1.1	127	179	myb_SHAQKYF
SlGlk43	mRNA:Solyc09g010340.1.1	1	79	REC superfamily
SlGlk42	mRNA:Solyc09g005370.1.1	82	135	myb_SHAQKYF
SlGlk42	mRNA:Solyc09g005370.1.1	168	212	Myb_CC_LHEQLE
SlGlk44	mRNA:Solyc09g072830.2.1	336	383	Myb_CC_LHEQLE
SlGlk44	mRNA:Solyc09g072830.2.1	250	304	myb_SHAQKYF
SlGlk41	mRNA:Solyc09g005030.1.1	62	111	myb_SHAQKYF
SlGlk45	mRNA:Solyc09g091880.2.1	148	195	Myb_CC_LHEQLE
SlGlk45	mRNA:Solyc09g091880.2.1	51	107	myb_SHAQKYF
SlGlk53	mRNA:Solyc10g083340.1.1	44	100	myb_SHAQKYF
SlGlk53	mRNA:Solyc10g083340.1.1	142	183	Myb_CC_LHEQLE
SlGlk54	mRNA:Solyc10g085620.1.1	128	175	Myb_CC_LHEQLE
SlGlk54	mRNA:Solyc10g085620.1.1	28	84	myb_SHAQKYF
SlGlk51	mRNA:Solyc10g080460.1.1	218	274	myb_SHAQKYF
SlGlk51	mRNA:Solyc10g080460.1.1	301	347	Myb_CC_LHEQLE
SlGlk52	mRNA:Solyc10g080960.1.1	88	141	myb_SHAQKYF
SlGlk46	mRNA:Solyc10g008160.2.1	1	192	PLN03162 superfamily
SlGlk48	mRNA:Solyc10g076460.1.1	63	117	myb_SHAQKYF
SlGlk49	mRNA:Solyc10g078310.1.1	89	142	myb_SHAQKYF
SlGlk47	mRNA:Solyc10g050420.1.1	12	127	REC superfamily
SlGlk47	mRNA:Solyc10g050420.1.1	186	343	PLN03162 superfamily
SlGlk50	mRNA:Solyc10g078720.1.1	309	356	Myb_CC_LHEQLE
SlGlk50	mRNA:Solyc10g078720.1.1	225	281	myb_SHAQKYF
SlGlk59	mRNA:Solyc11g067280.1.1	16	72	myb_SHAQKYF
SlGlk59	mRNA:Solyc11g067280.1.1	102	148	Myb_CC_LHEQLE
SlGlk55	mRNA:Solyc11g011770.1.1	267	320	myb_SHAQKYF
SlGlk58	mRNA:Solyc11g066230.1.1	20	134	REC superfamily
SlGlk58	mRNA:Solyc11g066230.1.1	191	270	PLN03162 superfamily
SlGlk57	mRNA:Solyc11g066170.1.1	20	134	REC superfamily
SlGlk57	mRNA:Solyc11g066170.1.1	176	298	PLN03162 superfamily
SlGlk56	mRNA:Solyc11g022470.1.1	106	152	Myb_CC_LHEQLE
SlGlk56	mRNA:Solyc11g022470.1.1	19	75	myb_SHAQKYF
SlGlk65	mRNA:Solyc12g098370.1.1	150	195	Myb_CC_LHEQLE
SlGlk65	mRNA:Solyc12g098370.1.1	52	108	myb_SHAQKYF
SlGlk62	mRNA:Solyc12g008800.1.1	114	166	myb_SHAQKYF
SlGlk61	mRNA:Solyc12g006800.1.1	239	295	myb_SHAQKYF
SlGlk64	mRNA:Solyc12g017370.1.1	128	167	Myb_CC_LHEQLE
SlGlk64	mRNA:Solyc12g017370.1.1	32	88	myb_SHAQKYF
SlGlk66	mRNA:Solyc12g099380.1.1	19	132	REC_typeB_ARR-like
SlGlk66	mRNA:Solyc12g099380.1.1	191	246	myb_SHAQKYF
SlGlk60	mRNA:Solyc12g006280.1.1	29	82	myb_SHAQKYF
SlGlk63	mRNA:Solyc12g010330.1.1	26	140	REC_typeB_ARR-like
SlGlk63	mRNA:Solyc12g010330.1.1	208	263	myb_SHAQKYF
