# Supplementary material for: Genome-wide identification of Tomato Golden 2-Like transcription factors and abiotic stress related members screening
Source: BMC Plant Biol. 2022 Feb 23;22:82. doi: 10.1186/s12870-022-03460-9 (PMC8864820; doi:10.1186/s12870-022-03460-9)
Supplement: Supplementary file 6 — Additional file 6. [file 12870_2022_3460_MOESM6_ESM.xlsx]

## Sheet: Sheet1
Table S6 Segmentally and tandemly duplicated G2-like gene pairs
Gene Name	Gene ID	Gene Name	Gene ID	Duplication Type
SlGlk3	Solyc01g108300.2.1	SlGlk11	Solyc02g090400.2.1	Segmental duplication
SlGlk5	Solyc02g076670.2.1	SlGlk12	Solyc03g006150.2.1	Segmental duplication
SlGlk24	Solyc05g054390.2.1	SlGlk66	Solyc12g099380.1.1	Segmental duplication
SlGlk26	Solyc06g005680.2.1	SlGlk32	Solyc06g076350.2.1	Segmental duplication
SlGlk29	Solyc06g061030.2.1	SlGlk40	Solyc08g077230.2.1	Segmental duplication
SlGlk27	Solyc06g008200.2.1	SlGlk44	Solyc09g072830.2.1	Segmental duplication
SlGlk36	Solyc07g053630.2.1	SlGlk46	Solyc10g008160.2.1	Segmental duplication
SlGlk33	Solyc07g005140.2.1	SlGlk63	Solyc12g010330.1.1	Segmental duplication
SlGlk45	Solyc09g091880.2.1	SlGlk65	Solyc12g098370.1.1	Segmental duplication
SlGlk6	Solyc02g080710.1.1	SlGlk7	Solyc02g080720.1.1	Tandem duplication
SlGlk7	Solyc02g080720.1.1	SlGlk8	Solyc02g080730.1.1	Tandem duplication
SlGlk8	Solyc02g080730.1.1	SlGlk9	Solyc02g080740.1.1	Tandem duplication
