# Supplementary material for: Genome-wide identification of Tomato Golden 2-Like transcription factors and abiotic stress related members screening
Source: BMC Plant Biol. 2022 Feb 23;22:82. doi: 10.1186/s12870-022-03460-9 (PMC8864820; doi:10.1186/s12870-022-03460-9)
Supplement: Supplementary file 7 — Additional file 7. [file 12870_2022_3460_MOESM7_ESM.xlsx]

## Sheet: Table S7.fin
Table S7 Cis-regulatory elements of G2-like genes in tomato
Gene Name	Motif Name	Sequence	Position	Length	Function
SlGlk1	GA-motif	ATAGATAA	301	8	Light responsive element
SlGlk1	STRE	AGGGG	848	5	Stress responsive element
SlGlk1	Box 4	ATTAAT	296	6	Light responsive element
SlGlk1	Box 4	ATTAAT	706	6	Light responsive element
SlGlk1	W box	TTGACC	560	6	Wound responsive element
SlGlk1	W box	TTGACC	1129	6	Wound responsive element
SlGlk1	W box	TTGACC	1147	6	Wound responsive element
SlGlk1	MBS	CAACTG	1272	6	Drought responsive element
SlGlk1	ACE	CTAACGTATT	1417	9	Light responsive element
SlGlk1	chs-Unit 1 m1	ACCTAACCCGC	361	10	Light responsive element
SlGlk1	TCA-element	CCATCTTTTT	1868	9	SA responsive element
SlGlk1	TCT-motif	TCTTAC	1720	6	Light responsive element
SlGlk1	AAAC-motif	CAATCAAAACCT	827	11	light responsive element
SlGlk1	ARE	AAACCA	314	6	Anaerobic responsive element
SlGlk1	ARE	AAACCA	1524	6	Anaerobic responsive element
SlGlk1	ARE	AAACCA	1546	6	Anaerobic responsive element
SlGlk1	ARE	AAACCA	1934	6	Anaerobic responsive element
SlGlk1	GT1-motif	GGTTAA	1473	6	light responsive element
SlGlk1	AT1-motif	AATTATTTTTTATT	268	14	Light responsive element
SlGlk1	TGA-element	AACGAC	696	6	IAA responsive element
SlGlk2	W box	TTGACC	1027	6	Wound responsive element
SlGlk2	chs-CMA1a	TTACTTAA	106	8	Light responsive element
SlGlk2	TCT-motif	TCTTAC	1467	6	Light responsive element
SlGlk2	TCT-motif	TCTTAC	1943	6	Light responsive element
SlGlk2	Myb	TAACTG	558	6	Abiotic responsive element
SlGlk2	Myb	TAACTG	930	6	Abiotic responsive element
SlGlk2	TC-rich repeats	GTTTTCTTAC	774	9	Stress responsive element
SlGlk2	TC-rich repeats	GTTTTCTTAC	1522	9	Stress responsive element
SlGlk2	LTR	CCGAAA	404	6	Low temperature responsive element
SlGlk2	LTR	CCGAAA	541	6	Low temperature responsive element
SlGlk2	LTR	CCGAAA	1857	6	Low temperature responsive element
SlGlk2	WRE3	CCACCT	834	6	Wound responsive element
SlGlk2	ABRE	CACGTG	20	6	ABA responsive element
SlGlk2	MBS	CAACTG	164	6	Drought responsive element
SlGlk2	Gap-box	CAAATGAA(A/G)A	1169	9.5	Light responsive element
SlGlk2	TC-rich repeats	ATTCTCTAAC	956	9	Stress responsive element
SlGlk2	Box 4	ATTAAT	1912	6	Light responsive element
SlGlk2	ATC-motif	AGTAATCT	651	8	Light responsive element
SlGlk2	STRE	AGGGG	274	5	Stress responsive element
SlGlk2	box S	AGCCACC	1599	7	Wound responsive element
SlGlk2	ABRE	ACGTG	363	5	ABA responsive element
SlGlk2	MRE	AACCTAA	973	7	Light responsive element
SlGlk2	WUN-motif	AAATTACT	1413	8	Wound responsive element
SlGlk3	TGA-box	TGACGTAA	134	8	IAA responsive element
SlGlk3	TCT-motif	TCTTAC	1819	6	Light responsive element
SlGlk3	ABRE	ACGTG	436	5	ABA responsive element
SlGlk3	ABRE	AACCCGG	1788	7	ABA responsive element
SlGlk3	W box	TTGACC	340	6	Wound responsive element
SlGlk3	STRE	AGGGG	300	5	Stress responsive element
SlGlk3	STRE	AGGGG	1839	5	Stress responsive element
SlGlk3	Box 4	ATTAAT	858	6	Light responsive element
SlGlk3	Box 4	ATTAAT	1027	6	Light responsive element
SlGlk3	MBS	CAACTG	1954	6	Drought responsive element
SlGlk3	Myb	TAACTG	477	6	Abiotic responsive element
SlGlk3	ARE	AAACCA	206	6	Anaerobic responsive element
SlGlk3	ARE	AAACCA	1003	6	Anaerobic responsive element
SlGlk3	GT1-motif	GGTTAA	185	6	light responsive element
SlGlk3	GT1-motif	GGTTAA	1324	6	light responsive element
SlGlk3	ERE	ATTTTAAA	486	8	Ethylene responsive element
SlGlk3	ERE	ATTTCATA	870	8	Ethylene responsive element
SlGlk3	ERE	ATTTTAAA	926	8	Ethylene responsive element
SlGlk3	ERE	ATTTTAAA	949	8	Ethylene responsive element
SlGlk4	TCT-motif	TCTTAC	941	6	Light responsive element
SlGlk4	AuxRR-core	GGTCCAT	1180	7	IAA responsive element
SlGlk4	TCA-element	CCATCTTTTT	228	9	SA responsive element
SlGlk4	STRE	AGGGG	184	5	Stress responsive element
SlGlk4	STRE	AGGGG	477	5	Stress responsive element
SlGlk4	W box	TTGACC	69	6	Wound responsive element
SlGlk4	W box	TTGACC	858	6	Wound responsive element
SlGlk4	W box	TTGACC	1899	6	Wound responsive element
SlGlk4	ABRE	ACGTG	320	5	ABA responsive element
SlGlk4	ABRE	ACGTG	974	5	ABA responsive element
SlGlk4	WUN-motif	CCATTTCAA	897	9	Wound responsive element
SlGlk4	TGACG/CGTCA-motif	TGACG/CGTCA	1102	5	MeJA responsive element
SlGlk4	Myb	TAACTG	361	6	Abiotic responsive element
SlGlk4	Myb	TAACTG	807	6	Abiotic responsive element
SlGlk4	Myb	TAACTG	1205	6	Abiotic responsive element
SlGlk4	ERE	ATTTTAAA	370	8	Ethylene responsive element
SlGlk4	ERE	ATTTTAAA	1383	8	Ethylene responsive element
SlGlk4	ERE	ATTTCATA	1597	8	Ethylene responsive element
SlGlk4	ERE	ATTTTAAA	1689	8	Ethylene responsive element
SlGlk4	TCCC-motif	TCTCCCT	1078	7	Light responsive element
SlGlk4	ARE	AAACCA	89	6	Anaerobic responsive element
SlGlk4	ARE	AAACCA	928	6	Anaerobic responsive element
SlGlk4	ARE	AAACCA	1238	6	Anaerobic responsive element
SlGlk4	ARE	AAACCA	1290	6	Anaerobic responsive element
SlGlk4	ARE	AAACCA	1949	6	Anaerobic responsive element
SlGlk5	WUN-motif	AAATTACTA	653	9	Wound responsive element
SlGlk5	WUN-motif	AAATTTCTT	1303	9	Wound responsive element
SlGlk5	LTR	CCGAAA	36	6	Low temperature responsive element
SlGlk5	MBS	CAACTG	1428	6	Drought responsive element
SlGlk5	ABRE	AACCCGG	1665	7	ABA responsive element
SlGlk5	GATA-motif	AAGATAAGATT	626	10	Light responsive element
SlGlk5	STRE	AGGGG	1675	5	Stress responsive element
SlGlk5	Box 4	ATTAAT	129	6	Light responsive element
SlGlk5	Box 4	ATTAAT	278	6	Light responsive element
SlGlk5	Box 4	ATTAAT	638	6	Light responsive element
SlGlk5	TCT-motif	TCTTAC	187	6	Light responsive element
SlGlk5	TCT-motif	TCTTAC	814	6	Light responsive element
SlGlk5	TCT-motif	TCTTAC	1965	6	Light responsive element
SlGlk5	ACE	CTAACGTATT	1562	9	Light responsive element
SlGlk5	GT1-motif	GGTTAAT	957	7	light responsive element
SlGlk5	ARE	AAACCA	595	6	Anaerobic responsive element
SlGlk5	ARE	AAACCA	898	6	Anaerobic responsive element
SlGlk5	ARE	AAACCA	1137	6	Anaerobic responsive element
SlGlk5	ERE	ATTTTAAA	1203	8	Ethylene responsive element
SlGlk5	AE-box	AGAAACAA	694	8	Light responsive element
SlGlk5	AE-box	AGAAACAA	1065	8	Light responsive element
SlGlk5	TGA-element	AACGAC	1193	6	IAA responsive element
SlGlk5	Myb	TAACTG	1617	6	Abiotic responsive element
SlGlk6	WRE3	CCACCT	1800	6	Wound responsive element
SlGlk6	MBSI	TTTTTACGGTTA	1735	11	Flavonoid resposive element
SlGlk6	ERE	ATTTCATA	529	8	Ethylene responsive element
SlGlk6	ERE	ATTTTAAA	546	8	Ethylene responsive element
SlGlk6	ERE	ATTTTAAA	1476	8	Ethylene responsive element
SlGlk6	TCCC-motif	TCTCCCT	491	7	Light responsive element
SlGlk6	GT1-motif	GGTTAAT	805	7	light responsive element
SlGlk6	GT1-motif	GTGTGTGAA	1649	9	light responsive element
SlGlk6	GT1-motif	GGTTAA	1742	6	light responsive element
SlGlk6	Myb	TAACTG	1618	6	Abiotic responsive element
SlGlk6	STRE	AGGGG	602	5	Stress responsive element
SlGlk6	STRE	AGGGG	665	5	Stress responsive element
SlGlk6	STRE	AGGGG	1028	5	Stress responsive element
SlGlk6	Box 4	ATTAAT	326	6	Light responsive element
SlGlk6	Box 4	ATTAAT	374	6	Light responsive element
SlGlk6	Box 4	ATTAAT	829	6	Light responsive element
SlGlk6	Box 4	ATTAAT	1172	6	Light responsive element
SlGlk6	Box 4	ATTAAT	1311	6	Light responsive element
SlGlk6	W box	TTGACC	743	6	Wound responsive element
SlGlk6	W box	TTGACC	1161	6	Wound responsive element
SlGlk6	GA-motif	ATAGATAA	1420	8	Light responsive element
SlGlk6	chs-CMA1a	TTACTTAA	1879	8	Light responsive element
SlGlk6	TCT-motif	TCTTAC	754	6	Light responsive element
SlGlk6	ATCT-motif	AATCTAATCC	168	9	Light responsive element
SlGlk6	TCA-element	CCATCTTTTT	151	9	SA responsive element
SlGlk6	TCA-element	CCATCTTTTT	216	9	SA responsive element
SlGlk6	TCA-element	CCATCTTTTT	2003	9	SA responsive element
SlGlk7	TCA-element	CCATCTTTTT	2003	9	SA responsive element
SlGlk7	MBS	CAACTG	242	6	Drought responsive element
SlGlk7	chs-CMA1a	TTACTTAA	364	8	Light responsive element
SlGlk7	TGACG/CGTCA-motif	TGACG/CGTCA	881	5	MeJA responsive element
SlGlk7	TGACG/CGTCA-motif	TGACG/CGTCA	1136	5	MeJA responsive element
SlGlk7	I-box	atGATAAGGTC	531	10	Light responsive element
SlGlk7	W box	TTGACC	33	6	Wound responsive element
SlGlk7	W box	TTGACC	1162	6	Wound responsive element
SlGlk7	Box 4	ATTAAT	544	6	Light responsive element
SlGlk7	Box 4	ATTAAT	624	6	Light responsive element
SlGlk7	Box 4	ATTAAT	783	6	Light responsive element
SlGlk7	Box 4	ATTAAT	1184	6	Light responsive element
SlGlk7	Box 4	ATTAAT	1716	6	Light responsive element
SlGlk7	STRE	AGGGG	347	5	Stress responsive element
SlGlk7	GATA-motif	AAGATAAGATT	302	10	Light responsive element
SlGlk7	3-AF1 binding site	TAAGAGAGGAA	723	10	light responsive element
SlGlk7	Myb	TAACTG	1622	6	Abiotic responsive element
SlGlk7	AE-box	AGAAACAA	137	8	Light responsive element
SlGlk7	ERE	ATTTTAAA	1478	8	Ethylene responsive element
SlGlk7	ERE	ATTTCATA	1847	8	Ethylene responsive element
SlGlk7	GT1-motif	GGTTAAT	169	7	light responsive element
SlGlk7	GT1-motif	GGTTAAT	759	7	light responsive element
SlGlk7	GT1-motif	GTGTGTGAA	1652	9	light responsive element
SlGlk7	WRE3	CCACCT	1802	6	Wound responsive element
SlGlk7	MBSI	TTTTTACGGTTA	1738	11	Flavonoid resposive element
SlGlk8	MRE	AACCTAA	662	7	Light responsive element
SlGlk8	TGACG/CGTCA-motif	TGACG/CGTCA	970	5	MeJA responsive element
SlGlk8	TGACG/CGTCA-motif	TGACG/CGTCA	1434	5	MeJA responsive element
SlGlk8	LTR	CCGAAA	272	6	Low temperature responsive element
SlGlk8	LTR	CCGAAA	484	6	Low temperature responsive element
SlGlk8	GA-motif	ATAGATAA	1165	8	Light responsive element
SlGlk8	Box 4	ATTAAT	87	6	Light responsive element
SlGlk8	Box 4	ATTAAT	709	6	Light responsive element
SlGlk8	Box 4	ATTAAT	871	6	Light responsive element
SlGlk8	Box 4	ATTAAT	1461	6	Light responsive element
SlGlk8	W box	TTGACC	1490	6	Wound responsive element
SlGlk8	Myb	TAACTG	1365	6	Abiotic responsive element
SlGlk8	3-AF1 binding site	TAAGAGAGGAA	783	10	light responsive element
SlGlk8	3-AF1 binding site	TAAGAGAGGAA	1871	10	light responsive element
SlGlk8	GT1-motif	GGTTAAT	110	7	light responsive element
SlGlk8	GT1-motif	GTGTGTGAA	1396	9	light responsive element
SlGlk8	ERE	ATTTCATA	1078	8	Ethylene responsive element
SlGlk8	ERE	ATTTTAAA	1221	8	Ethylene responsive element
SlGlk8	TC-rich repeats	ATTCTCTAAC	130	9	Stress responsive element
SlGlk8	TC-rich repeats	GTTTTCTTAC	1779	9	Stress responsive element
SlGlk8	TCCC-motif	TCTCCCT	373	7	Light responsive element
SlGlk8	WRE3	CCACCT	1547	6	Wound responsive element
SlGlk9	WRE3	CCACCT	1801	6	Wound responsive element
SlGlk9	MBSI	TTTTTACGGTTA	1737	11	Flavonoid resposive element
SlGlk9	ERE	ATTTTAAA	1210	8	Ethylene responsive element
SlGlk9	ERE	ATTTCATA	1334	8	Ethylene responsive element
SlGlk9	ERE	ATTTTAAA	1476	8	Ethylene responsive element
SlGlk9	AE-box	AGAAACTT	1414	8	Light responsive element
SlGlk9	TCCC-motif	TCTCCCT	539	7	Light responsive element
SlGlk9	GT1-motif	GGTTAAT	832	7	light responsive element
SlGlk9	GT1-motif	GTGTGTGAA	1651	9	light responsive element
SlGlk9	GT1-motif	GGTTAA	1744	6	light responsive element
SlGlk9	ARE	AAACCA	643	6	Anaerobic responsive element
SlGlk9	Myb	TAACTG	458	6	Abiotic responsive element
SlGlk9	Myb	TAACTG	1621	6	Abiotic responsive element
SlGlk9	3-AF1 binding site	TAAGAGAGGAA	1964	10	light responsive element
SlGlk9	STRE	AGGGG	691	5	Stress responsive element
SlGlk9	Box 4	ATTAAT	374	6	Light responsive element
SlGlk9	Box 4	ATTAAT	422	6	Light responsive element
SlGlk9	Box 4	ATTAAT	856	6	Light responsive element
SlGlk9	Box 4	ATTAAT	1172	6	Light responsive element
SlGlk9	Box 4	ATTAAT	1311	6	Light responsive element
SlGlk9	Box 4	ATTAAT	1698	6	Light responsive element
SlGlk9	Box 4	ATTAAT	1715	6	Light responsive element
SlGlk9	W box	TTGACC	770	6	Wound responsive element
SlGlk9	GA-motif	ATAGATAA	1420	8	Light responsive element
SlGlk9	chs-CMA1a	TTACTTAA	844	8	Light responsive element
SlGlk9	LTR	CCGAAA	527	6	Low temperature responsive element
SlGlk9	TGACG/CGTCA-motif	TGACG/CGTCA	940	5	MeJA responsive element
SlGlk9	LAMP-element	CTTTATCA	36	8	Light responsive element
SlGlk9	ACE	CTAACGTATT	1302	9	Light responsive element
SlGlk9	TCT-motif	TCTTAC	781	6	Light responsive element
SlGlk9	ATCT-motif	AATCTAATCC	108	9	Light responsive element
SlGlk9	TCA-element	CCATCTTTTT	264	9	SA responsive element
SlGlk9	TCA-element	CCATCTTTTT	2003	9	SA responsive element
SlGlk10	Myb	TAACTG	1438	6	Abiotic responsive element
SlGlk10	TGA-element	AACGAC	782	6	IAA responsive element
SlGlk10	ARE	AAACCA	1221	6	Anaerobic responsive element
SlGlk10	GT1-motif	GCGGTAATT	427	9	light responsive element
SlGlk10	GT1-motif	GTGTGTGAA	1476	9	light responsive element
SlGlk10	GT1-motif	GGTTAA	1579	6	light responsive element
SlGlk10	TATC-box	TATCCCA	803	7	GA responsive element
SlGlk10	TATC-box	TATCCCA	859	7	GA responsive element
SlGlk10	TATC-box	TATCCCA	897	7	GA responsive element
SlGlk10	ERE	ATTTTAAA	581	8	Ethylene responsive element
SlGlk10	ERE	ATTTCATA	751	8	Ethylene responsive element
SlGlk10	G-box	CACGAC	906	6	Light responsive element
SlGlk10	G-box	CACGAC	1691	6	Light responsive element
SlGlk10	GARE-motif	TCTGTTG	1932	7	GA responsive element
SlGlk10	TCT-motif	TCTTAC	1042	6	Light responsive element
SlGlk10	GATA-motif	AAGATAAGATT	1205	10	Light responsive element
SlGlk10	ABRE	TACGGTC	98	7	ABA responsive element
SlGlk10	GA-motif	ATAGATAA	1628	8	Light responsive element
SlGlk10	Box 4	ATTAAT	493	6	Light responsive element
SlGlk10	Box 4	ATTAAT	879	6	Light responsive element
SlGlk10	Box 4	ATTAAT	1229	6	Light responsive element
SlGlk10	Box 4	ATTAAT	1393	6	Light responsive element
SlGlk10	STRE	AGGGG	994	5	Stress responsive element
SlGlk10	STRE	AGGGG	1566	5	Stress responsive element
SlGlk10	TGACG/CGTCA-motif	TGACG/CGTCA	1513	5	MeJA responsive element
SlGlk10	WUN-motif	TAATTACTC	1425	9	Wound responsive element
SlGlk10	LTR	CCGAAA	1457	6	Low temperature responsive element
SlGlk11	WRE3	CCACCT	33	6	Wound responsive element
SlGlk11	DRE core	GCCGAC	706	6	Abiotic responsive element
SlGlk11	ERE	ATTTTAAA	1024	8	Ethylene responsive element
SlGlk11	ERE	ATTTCATA	1092	8	Ethylene responsive element
SlGlk11	ERE	ATTTCATA	1254	8	Ethylene responsive element
SlGlk11	ERE	ATTTTAAA	1459	8	Ethylene responsive element
SlGlk11	GT1-motif	GGTTAAT	63	7	light responsive element
SlGlk11	P-box	CCTTTTG	57	7	GA responsive element
SlGlk11	TGA-element	AACGAC	1070	6	IAA responsive element
SlGlk11	Myb	TAACTG	520	6	Abiotic responsive element
SlGlk11	Box 4	ATTAAT	44	6	Light responsive element
SlGlk11	Box 4	ATTAAT	86	6	Light responsive element
SlGlk11	Box 4	ATTAAT	201	6	Light responsive element
SlGlk11	Box 4	ATTAAT	229	6	Light responsive element
SlGlk11	Box 4	ATTAAT	453	6	Light responsive element
SlGlk11	Box 4	ATTAAT	584	6	Light responsive element
SlGlk11	Box 4	ATTAAT	1414	6	Light responsive element
SlGlk11	Box 4	ATTAAT	1448	6	Light responsive element
SlGlk11	Box 4	ATTAAT	1598	6	Light responsive element
SlGlk11	Box 4	ATTAAT	1618	6	Light responsive element
SlGlk11	Box 4	ATTAAT	1747	6	Light responsive element
SlGlk11	W box	TTGACC	774	6	Wound responsive element
SlGlk11	ABRE	ACGTG	349	5	ABA responsive element
SlGlk11	WUN-motif	TAATTACTC	1288	9	Wound responsive element
SlGlk11	WUN-motif	AAATTACTA	1310	9	Wound responsive element
SlGlk11	TCT-motif	TCTTAC	157	6	Light responsive element
SlGlk11	ATCT-motif	AATCTAATCC	577	9	Light responsive element
SlGlk11	GARE-motif	TCTGTTG	1848	7	GA responsive element
SlGlk12	GATA-motif	GATAGGA	257	7	Light responsive element
SlGlk12	O2-site	GTTGACGTGA	407	9	Zein responsive element
SlGlk12	ABRE	ACGTG	88	5	ABA responsive element
SlGlk12	W box	TTGACC	1586	6	Wound responsive element
SlGlk12	W box	TTGACC	1659	6	Wound responsive element
SlGlk12	STRE	AGGGG	530	5	Stress responsive element
SlGlk12	Box 4	ATTAAT	1527	6	Light responsive element
SlGlk12	Box 4	ATTAAT	1558	6	Light responsive element
SlGlk12	WUN-motif	AAATTACTA	854	9	Wound responsive element
SlGlk12	chs-CMA1a	TTACTTAA	1844	8	Light responsive element
SlGlk12	G-box	CACGAC	1047	6	Light responsive element
SlGlk12	TCA-element	CCATCTTTTT	908	9	SA responsive element
SlGlk12	ATCT-motif	AATCTAATCC	953	10	Light responsive element
SlGlk12	ARE	AAACCA	826	6	Anaerobic responsive element
SlGlk12	TCCC-motif	TCTCCCT	671	7	Light responsive element
SlGlk12	AE-box	AGAAACTT	707	8	Light responsive element
SlGlk12	AE-box	AGAAACTT	1153	8	Light responsive element
SlGlk12	TC-rich repeats	ATTCTCTAAC	319	9	Stress responsive element
SlGlk12	ERE	ATTTTAAA	196	8	Ethylene responsive element
SlGlk12	ERE	ATTTTAAA	976	8	Ethylene responsive element
SlGlk12	ERE	ATTTTAAA	1039	8	Ethylene responsive element
SlGlk12	ERE	ATTTCATA	1630	8	Ethylene responsive element
SlGlk12	P-box	CCTTTTG	485	7	GA responsive element
SlGlk13	AE-box	AGAAACTT	66	8	Light responsive element
SlGlk13	TATC-box	TATCCCA	1329	7	GA responsive element
SlGlk13	TCT-motif	TCTTAC	1593	6	Light responsive element
SlGlk13	TCT-motif	TCTTAC	1660	6	Light responsive element
SlGlk13	WUN-motif	TAATTACTC	1067	9	Wound responsive element
SlGlk13	WUN-motif	AAATTTCCT	1982	9	Wound responsive element
SlGlk13	GATA-motif	GATAGGA	1505	7	Light responsive element
SlGlk13	GA-motif	ATAGATAA	2007	8	Light responsive element
SlGlk13	ABRE	ACGTG	665	5	ABA responsive element
SlGlk13	ABRE	ACGTG	721	5	ABA responsive element
SlGlk13	O2-site	GTTGACGTGA	1842	9	Zein responsive element
SlGlk13	Box 4	ATTAAT	114	6	Light responsive element
SlGlk13	Box 4	ATTAAT	445	6	Light responsive element
SlGlk13	Box 4	ATTAAT	636	6	Light responsive element
SlGlk13	Box 4	ATTAAT	803	6	Light responsive element
SlGlk13	Box 4	ATTAAT	1061	6	Light responsive element
SlGlk13	Box 4	ATTAAT	1086	6	Light responsive element
SlGlk13	Box 4	ATTAAT	1159	6	Light responsive element
SlGlk13	Box 4	ATTAAT	1231	6	Light responsive element
SlGlk13	STRE	AGGGG	505	5	Stress responsive element
SlGlk13	STRE	AGGGG	559	5	Stress responsive element
SlGlk13	STRE	AGGGG	620	5	Stress responsive element
SlGlk13	STRE	AGGGG	651	5	Stress responsive element
SlGlk13	STRE	AGGGG	1304	5	Stress responsive element
SlGlk13	STRE	AGGGG	1345	5	Stress responsive element
SlGlk14	Box 4	ATTAAT	1232	6	Light responsive element
SlGlk14	Box 4	ATTAAT	1255	6	Light responsive element
SlGlk14	Box 4	ATTAAT	1365	6	Light responsive element
SlGlk14	Box 4	ATTAAT	1520	6	Light responsive element
SlGlk14	ABRE	ACGTG	535	5	ABA responsive element
SlGlk14	I-box	AGATAAGG	674	8	Light responsive element
SlGlk14	TGACG/CGTCA-motif	TGACG/CGTCA	1004	5	MeJA responsive element
SlGlk14	TGACG/CGTCA-motif	TGACG/CGTCA	1062	5	MeJA responsive element
SlGlk14	TGACG/CGTCA-motif	TGACG/CGTCA	1160	5	MeJA responsive element
SlGlk14	TGACG/CGTCA-motif	TGACG/CGTCA	1694	5	MeJA responsive element
SlGlk14	ACE	GACACGTATG	69	9	Light responsive element
SlGlk14	chs-CMA2a	TCACTTGA	326	8	Light responsive element
SlGlk14	WRE3	CCACCT	1117	6	Wound responsive element
SlGlk14	WRE3	CCACCT	1806	6	Wound responsive element
SlGlk14	ERE	ATTTCATA	562	8	Ethylene responsive element
SlGlk14	ERE	ATTTTAAA	1594	8	Ethylene responsive element
SlGlk14	ERE	ATTTTAAA	1596	8	Ethylene responsive element
SlGlk14	GT1-motif	GGTTAAT	202	7	light responsive element
SlGlk14	GT1-motif	GGTTAAT	873	7	light responsive element
SlGlk14	ARE	AAACCA	1938	6	Anaerobic responsive element
SlGlk14	TGA-element	AACGAC	543	6	IAA responsive element
SlGlk14	TGA-element	AACGAC	2000	6	IAA responsive element
SlGlk15	MBS	CAACTG	38	6	Drought responsive element
SlGlk15	MBS	CAACTG	1130	6	Drought responsive element
SlGlk15	WUN-motif	AAATTACT	376	8	Wound responsive element
SlGlk15	Box 4	ATTAAT	635	6	Light responsive element
SlGlk15	STRE	AGGGG	833	5	Stress responsive element
SlGlk15	STRE	AGGGG	1943	5	Stress responsive element
SlGlk15	ABRE	ACGTG	50	5	ABA responsive element
SlGlk15	ABRE	ACGTG	1040	5	ABA responsive element
SlGlk15	TCT-motif	TCTTAC	306	6	Light responsive element
SlGlk15	LAMP-element	CTTTATCA	1168	8	Light responsive element
SlGlk15	ERE	ATTTTAAA	926	8	Ethylene responsive element
SlGlk15	ERE	ATTTTAAA	1793	8	Ethylene responsive element
SlGlk15	GT1-motif	GGTTAA	1866	6	light responsive element
SlGlk15	ARE	AAACCA	1591	6	Anaerobic responsive element
SlGlk15	ARE	AAACCA	1750	6	Anaerobic responsive element
SlGlk15	TGA-element	AACGAC	816	6	IAA responsive element
SlGlk15	P-box	CCTTTTG	1481	7	GA responsive element
SlGlk15	P-box	CCTTTTG	1628	7	GA responsive element
SlGlk15	P-box	CCTTTTG	1680	7	GA responsive element
SlGlk15	P-box	CCTTTTG	1732	7	GA responsive element
SlGlk15	P-box	CCTTTTG	1892	7	GA responsive element
SlGlk16	WUN-motif	AAATTTCTT	694	9	Wound responsive element
SlGlk16	Box 4	ATTAAT	926	6	Light responsive element
SlGlk16	Box 4	ATTAAT	1238	6	Light responsive element
SlGlk16	Box 4	ATTAAT	1264	6	Light responsive element
SlGlk16	Box 4	ATTAAT	1329	6	Light responsive element
SlGlk16	Box 4	ATTAAT	1716	6	Light responsive element
SlGlk16	Box 4	ATTAAT	1746	6	Light responsive element
SlGlk16	STRE	AGGGG	1366	5	Stress responsive element
SlGlk16	STRE	AGGGG	1764	5	Stress responsive element
SlGlk16	O2-site	GATGA(C/T)(A/G)TG(A/G)	521	8	Zein responsive element
SlGlk16	ABRE	ACGTG	93	5	ABA responsive element
SlGlk16	ABRE	ACGTG	1758	5	ABA responsive element
SlGlk16	TC-rich repeats	GTTTTCTTAC	718	9	Stress responsive element
SlGlk16	TC-rich repeats	GTTTTCTTAC	882	9	Stress responsive element
SlGlk16	ERE	ATTTCATA	178	8	Ethylene responsive element
SlGlk16	ARE	AAACCA	287	6	Anaerobic responsive element
SlGlk16	ARE	AAACCA	796	6	Anaerobic responsive element
SlGlk16	3-AF1 binding site	TAAGAGAGGAA	142	10	light responsive element
SlGlk16	Myb	TAACTG	273	6	Abiotic responsive element
SlGlk16	Myb	TAACTG	577	6	Abiotic responsive element
SlGlk16	Myb	TAACTG	782	6	Abiotic responsive element
SlGlk16	P-box	CCTTTTG	2002	7	GA responsive element
SlGlk17	GT1-motif	GGTTAAT	447	7	light responsive element
SlGlk17	ARE	AAACCA	813	6	Anaerobic responsive element
SlGlk17	ARE	AAACCA	1989	6	Anaerobic responsive element
SlGlk17	ERE	ATTTTAAA	652	8	Ethylene responsive element
SlGlk17	ERE	ATTTTAAA	1697	8	Ethylene responsive element
SlGlk17	ERE	ATTTCATA	1872	8	Ethylene responsive element
SlGlk17	AE-box	AGAAACAA	170	8	Light responsive element
SlGlk17	TCCC-motif	TCTCCCT	1067	7	Light responsive element
SlGlk17	WRE3	CCACCT	1133	6	Wound responsive element
SlGlk17	box S	AGCCACC	1141	7	Wound responsive element
SlGlk17	Myb	TAACTG	1763	6	Abiotic responsive element
SlGlk17	TGACG/CGTCA-motif	TGACG/CGTCA	823	5	MeJA responsive element
SlGlk17	TGACG/CGTCA-motif	TGACG/CGTCA	1219	5	MeJA responsive element
SlGlk17	MBS	CAACTG	1495	6	Drought responsive element
SlGlk17	MBS	CAACTG	1718	6	Drought responsive element
SlGlk17	GATA-motif	AAGGATAAGG	1389	9	Light responsive element
SlGlk17	Box 4	ATTAAT	407	6	Light responsive element
SlGlk17	Box 4	ATTAAT	1976	6	Light responsive element
SlGlk17	STRE	AGGGG	242	5	Stress responsive element
SlGlk17	STRE	AGGGG	1161	5	Stress responsive element
SlGlk17	TCA-element	CCATCTTTTT	1188	9	SA responsive element
SlGlk17	TCA-element	CCATCTTTTT	1848	9	SA responsive element
SlGlk17	TCA-element	CCATCTTTTT	1911	9	SA responsive element
SlGlk18	ABRE	ACGTG	33	5	ABA responsive element
SlGlk18	ABRE	CACGTG	526	6	ABA responsive element
SlGlk18	GA-motif	ATAGATAA	2008	8	Light responsive element
SlGlk18	STRE	AGGGG	1047	5	Stress responsive element
SlGlk18	STRE	AGGGG	1103	5	Stress responsive element
SlGlk18	STRE	AGGGG	1656	5	Stress responsive element
SlGlk18	STRE	AGGGG	1685	5	Stress responsive element
SlGlk18	W box	TTGACC	1159	6	Wound responsive element
SlGlk18	W box	TTGACC	1832	6	Wound responsive element
SlGlk18	GC-motif	CCCCCG	1123	6	Anaerobic responsive element
SlGlk18	WUN-motif	AAATTACT	1551	8	Wound responsive element
SlGlk18	LTR	CCGAAA	952	6	Low temperature responsive element
SlGlk18	MBS	CAACTG	1084	6	Drought responsive element
SlGlk18	MBS	CAACTG	1151	6	Drought responsive element
SlGlk18	ACE	GACACGTATG	1450	9	Light responsive element
SlGlk18	MRE	AACCTAA	495	7	Light responsive element
SlGlk18	TCT-motif	TCTTAC	387	6	Light responsive element
SlGlk18	AuxRR-core	GGTCCAT	1225	7	IAA responsive element
SlGlk18	WRE3	CCACCT	1231	6	Wound responsive element
SlGlk18	WRE3	CCACCT	1300	6	Wound responsive element
SlGlk18	GT1-motif	GGTTAA	763	6	light responsive element
SlGlk18	ARE	AAACCA	937	6	Anaerobic responsive element
SlGlk18	ERE	ATTTTAAA	1215	8	Ethylene responsive element
SlGlk18	ERE	ATTTCATA	1728	8	Ethylene responsive element
SlGlk18	TATC-box	TATCCCA	1410	7	GA responsive element
SlGlk18	Myb	TAACTG	977	6	Abiotic responsive element
SlGlk18	Myb	TAACTG	1826	6	Abiotic responsive element
SlGlk19	ERE	ATTTTAAA	677	8	Ethylene responsive element
SlGlk19	ERE	ATTTCATA	815	8	Ethylene responsive element
SlGlk19	ERE	ATTTTAAA	891	8	Ethylene responsive element
SlGlk19	ERE	ATTTTAAA	1344	8	Ethylene responsive element
SlGlk19	TC-rich repeats	GTTTTCTTAC	276	9	Stress responsive element
SlGlk19	GT1-motif	GGTTAA	1941	6	light responsive element
SlGlk19	WUN-motif	AAATTACTA	240	9	Wound responsive element
SlGlk19	WUN-motif	AAATTACT	1454	8	Wound responsive element
SlGlk19	Box 4	ATTAAT	41	6	Light responsive element
SlGlk19	Box 4	ATTAAT	75	6	Light responsive element
SlGlk19	Box 4	ATTAAT	360	6	Light responsive element
SlGlk19	Box 4	ATTAAT	439	6	Light responsive element
SlGlk19	Box 4	ATTAAT	765	6	Light responsive element
SlGlk19	Box 4	ATTAAT	1109	6	Light responsive element
SlGlk19	Box 4	ATTAAT	1632	6	Light responsive element
SlGlk19	ABRE	ACGTG	1404	5	ABA responsive element
SlGlk19	TCA-element	CCATCTTTTT	172	9	SA responsive element
SlGlk19	GARE-motif	TCTGTTG	287	7	GA responsive element
SlGlk19	GARE-motif	TCTGTTG	294	7	GA responsive element
SlGlk19	MRE	AACCTAA	1290	7	Light responsive element
SlGlk20	P-box	CCTTTTG	1006	7	GA responsive element
SlGlk20	ARE	AAACCA	734	6	Anaerobic responsive element
SlGlk20	ARE	AAACCA	1606	6	Anaerobic responsive element
SlGlk20	TC-rich repeats	ATTCTCTAAC	1064	9	Stress responsive element
SlGlk20	ERE	ATTTTAAA	752	8	Ethylene responsive element
SlGlk20	ERE	ATTTCATA	1764	8	Ethylene responsive element
SlGlk20	TCA-element	CCATCTTTTT	1327	9	SA responsive element
SlGlk20	TCT-motif	TCTTAC	253	6	Light responsive element
SlGlk20	I-box	gGATAAGGTG	1173	9	Light responsive element
SlGlk20	LTR	CCGAAA	94	6	Low temperature responsive element
SlGlk20	LTR	CCGAAA	1582	6	Low temperature responsive element
SlGlk20	O2-site	GTTGACGTGA	1638	9	Zein responsive element
SlGlk20	ABRE	ACGTG	186	5	ABA responsive element
SlGlk20	GATA-motif	GATAGGA	1558	7	Light responsive element
SlGlk20	STRE	AGGGG	59	5	Stress responsive element
SlGlk20	STRE	AGGGG	909	5	Stress responsive element
SlGlk20	STRE	AGGGG	1078	5	Stress responsive element
SlGlk20	STRE	AGGGG	1333	5	Stress responsive element
SlGlk20	Box 4	ATTAAT	487	6	Light responsive element
SlGlk20	Box 4	ATTAAT	1506	6	Light responsive element
SlGlk21	MRE	AACCTAA	883	7	Light responsive element
SlGlk21	TCT-motif	TCTTAC	1169	6	Light responsive element
SlGlk21	TCT-motif	TCTTAC	1589	6	Light responsive element
SlGlk21	chs-CMA2a	TCACTTGA	1118	8	Light responsive element
SlGlk21	Box 4	ATTAAT	112	6	Light responsive element
SlGlk21	Box 4	ATTAAT	161	6	Light responsive element
SlGlk21	Box 4	ATTAAT	298	6	Light responsive element
SlGlk21	Box 4	ATTAAT	1001	6	Light responsive element
SlGlk21	Box 4	ATTAAT	1153	6	Light responsive element
SlGlk21	Box 4	ATTAAT	1196	6	Light responsive element
SlGlk21	Box 4	ATTAAT	1237	6	Light responsive element
SlGlk21	Box 4	ATTAAT	1260	6	Light responsive element
SlGlk21	Box 4	ATTAAT	1298	6	Light responsive element
SlGlk21	Box 4	ATTAAT	1570	6	Light responsive element
SlGlk21	STRE	AGGGG	654	5	Stress responsive element
SlGlk21	STRE	AGGGG	1866	5	Stress responsive element
SlGlk21	W box	TTGACC	1950	6	Wound responsive element
SlGlk21	GATA-motif	AAGATAAGATT	744	10	Light responsive element
SlGlk21	TGACG/CGTCA-motif	TGACG/CGTCA	772	5	MeJA responsive element
SlGlk21	AT1-motif	AATTATTTTTTATT	1616	13	Light responsive element
SlGlk21	WRE3	CCACCT	947	6	Wound responsive element
SlGlk21	TC-rich repeats	GTTTTCTTAC	1821	9	Stress responsive element
SlGlk21	ERE	ATTTCATA	236	8	Ethylene responsive element
SlGlk21	ERE	ATTTTAAA	964	8	Ethylene responsive element
SlGlk21	ARE	AAACCA	1653	6	Anaerobic responsive element
SlGlk21	GT1-motif	GGTTAA	72	6	light responsive element
SlGlk22	Myb	TAACTG	338	6	Abiotic responsive element
SlGlk22	Myb	TAACTG	1548	6	Abiotic responsive element
SlGlk22	3-AF1 binding site	TAAGAGAGGAA	1393	10	light responsive element
SlGlk22	Sp1	GGGCGG	796	6	light responsive element
SlGlk22	Sp1	GGGCGG	901	6	light responsive element
SlGlk22	ERE	ATTTTAAA	314	8	Ethylene responsive element
SlGlk22	ERE	ATTTTAAA	724	8	Ethylene responsive element
SlGlk22	ERE	ATTTTAAA	1634	8	Ethylene responsive element
SlGlk22	ERE	ATTTCATA	1672	8	Ethylene responsive element
SlGlk22	GT1-motif	GGTTAA	1032	6	light responsive element
SlGlk22	chs-CMA2a	TCACTTGA	1220	8	Light responsive element
SlGlk22	WUN-motif	AAATTTCTT	185	9	Wound responsive element
SlGlk22	W box	TTGACC	87	6	Wound responsive element
SlGlk22	W box	TTGACC	532	6	Wound responsive element
SlGlk22	W box	TTGACC	714	6	Wound responsive element
SlGlk22	Box 4	ATTAAT	405	6	Light responsive element
SlGlk22	Box 4	ATTAAT	1471	6	Light responsive element
SlGlk22	Box 4	ATTAAT	1971	6	Light responsive element
SlGlk22	STRE	AGGGG	619	5	Stress responsive element
SlGlk22	STRE	AGGGG	630	5	Stress responsive element
SlGlk22	STRE	AGGGG	675	5	Stress responsive element
SlGlk22	STRE	AGGGG	829	5	Stress responsive element
SlGlk22	STRE	AGGGG	841	5	Stress responsive element
SlGlk22	STRE	AGGGG	855	5	Stress responsive element
SlGlk22	STRE	AGGGG	918	5	Stress responsive element
SlGlk22	STRE	AGGGG	926	5	Stress responsive element
SlGlk22	STRE	AGGGG	1119	5	Stress responsive element
SlGlk22	GA-motif	ATAGATAA	355	8	Light responsive element
SlGlk22	ABRE	AACCCGG	887	7	ABA responsive element
SlGlk22	ABRE	ACGTG	1354	5	ABA responsive element
SlGlk23	chs-CMA1a	TTACTTAA	217	8	Light responsive element
SlGlk23	Box 4	ATTAAT	120	6	Light responsive element
SlGlk23	Box 4	ATTAAT	671	6	Light responsive element
SlGlk23	Box 4	ATTAAT	1030	6	Light responsive element
SlGlk23	STRE	AGGGG	512	5	Stress responsive element
SlGlk23	STRE	AGGGG	1493	5	Stress responsive element
SlGlk23	STRE	AGGGG	1811	5	Stress responsive element
SlGlk23	ABRE	ACGTG	1903	5	ABA responsive element
SlGlk23	GATA-motif	GATAGGA	1361	7	Light responsive element
SlGlk23	TCT-motif	TCTTAC	1039	6	Light responsive element
SlGlk23	ATCT-motif	AATCTAATCC	1263	9	Light responsive element
SlGlk23	TCA-element	CCATCTTTTT	595	9	SA responsive element
SlGlk23	chs-CMA2a	TCACTTGA	1134	8	Light responsive element
SlGlk23	MRE	AACCTAA	1169	7	Light responsive element
SlGlk23	GT1-motif	GGTTAA	549	6	light responsive element
SlGlk23	WRE3	CCACCT	1617	6	Wound responsive element
SlGlk23	Box II	TGGTAATAA	1423	9	Light responsive element
SlGlk23	ATC-motif	TGCTATCCA	1789	9	Light responsive element
SlGlk24	ERE	ATTTTAAA	641	8	Ethylene responsive element
SlGlk24	ERE	ATTTTAAA	817	8	Ethylene responsive element
SlGlk24	ERE	ATTTTAAA	1275	8	Ethylene responsive element
SlGlk24	ARE	AAACCA	147	6	Anaerobic responsive element
SlGlk24	ARE	AAACCA	1654	6	Anaerobic responsive element
SlGlk24	Box 4	ATTAAT	179	6	Light responsive element
SlGlk24	Box 4	ATTAAT	241	6	Light responsive element
SlGlk24	Box 4	ATTAAT	282	6	Light responsive element
SlGlk24	Box 4	ATTAAT	429	6	Light responsive element
SlGlk24	Box 4	ATTAAT	512	6	Light responsive element
SlGlk24	Box 4	ATTAAT	596	6	Light responsive element
SlGlk24	Box 4	ATTAAT	742	6	Light responsive element
SlGlk24	Box 4	ATTAAT	895	6	Light responsive element
SlGlk24	Box 4	ATTAAT	1110	6	Light responsive element
SlGlk24	Box 4	ATTAAT	1259	6	Light responsive element
SlGlk24	Box 4	ATTAAT	1356	6	Light responsive element
SlGlk24	Box 4	ATTAAT	1745	6	Light responsive element
SlGlk24	ABRE	ACGTG	766	5	ABA responsive element
SlGlk24	AuxRR-core	GGTCCAT	497	7	IAA responsive element
SlGlk24	TCA-element	CCATCTTTTT	838	9	SA responsive element
SlGlk25	P-box	CCTTTTG	1143	7	GA responsive element
SlGlk25	ARE	AAACCA	545	6	Anaerobic responsive element
SlGlk25	TCA-element	TCAGAAGAGG	587	9	SA responsive element
SlGlk25	GARE-motif	TCTGTTG	262	7	GA responsive element
SlGlk25	MBS	CAACTG	428	6	Drought responsive element
SlGlk25	MBS	CAACTG	1567	6	Drought responsive element
SlGlk25	I-box	gGATAAGGTG	1806	9	Light responsive element
SlGlk25	TGACG/CGTCA-motif	TGACG/CGTCA	663	5	MeJA responsive element
SlGlk25	TGACG/CGTCA-motif	TGACG/CGTCA	1918	5	MeJA responsive element
SlGlk25	STRE	AGGGG	758	5	Stress responsive element
SlGlk25	STRE	AGGGG	1256	5	Stress responsive element
SlGlk25	Box 4	ATTAAT	1996	6	Light responsive element
SlGlk25	ABRE	CACGTG	1123	6	ABA responsive element
SlGlk25	O2-site	GTTGACGTGA	1750	9	Zein responsive element
SlGlk26	TC-rich repeats	GTTTTCTTAC	513	9	Stress responsive element
SlGlk26	ERE	ATTTTAAA	209	8	Ethylene responsive element
SlGlk26	ERE	ATTTTAAA	349	8	Ethylene responsive element
SlGlk26	ERE	ATTTCATA	383	8	Ethylene responsive element
SlGlk26	ERE	ATTTTAAA	611	8	Ethylene responsive element
SlGlk26	ERE	ATTTTAAA	734	8	Ethylene responsive element
SlGlk26	ERE	ATTTTAAA	757	8	Ethylene responsive element
SlGlk26	ERE	ATTTTAAA	803	8	Ethylene responsive element
SlGlk26	ERE	ATTTTAAA	1532	8	Ethylene responsive element
SlGlk26	TGA-element	AACGAC	124	6	IAA responsive element
SlGlk26	ABRE	ACGTG	544	5	ABA responsive element
SlGlk26	ABRE	ACGTG	1388	5	ABA responsive element
SlGlk26	ABRE	ACGTG	1759	5	ABA responsive element
SlGlk26	Box 4	ATTAAT	491	6	Light responsive element
SlGlk26	Box 4	ATTAAT	1365	6	Light responsive element
SlGlk26	Box 4	ATTAAT	1378	6	Light responsive element
SlGlk26	Box 4	ATTAAT	1400	6	Light responsive element
SlGlk26	Box 4	ATTAAT	1524	6	Light responsive element
SlGlk26	STRE	AGGGG	892	5	Stress responsive element
SlGlk26	STRE	AGGGG	1819	5	Stress responsive element
SlGlk26	WUN-motif	AAATTACT	1089	8	Wound responsive element
SlGlk26	WUN-motif	AAATTTCTT	1971	9	Wound responsive element
SlGlk26	MRE	AACCTAA	73	7	Light responsive element
SlGlk26	TCA-element	CCATCTTTTT	1652	9	SA responsive element
SlGlk26	TCA-element	CCATCTTTTT	1727	9	SA responsive element
SlGlk26	TCA-element	TCAGAAGAGG	1919	9	SA responsive element
SlGlk26	TCT-motif	TCTTAC	1015	6	Light responsive element
SlGlk26	TCT-motif	TCTTAC	1356	6	Light responsive element
SlGlk26	AuxRR-core	GGTCCAT	718	7	IAA responsive element
SlGlk27	GT1-motif	GGTTAA	1582	6	light responsive element
SlGlk27	ARE	AAACCA	634	6	Anaerobic responsive element
SlGlk27	ARE	AAACCA	1775	6	Anaerobic responsive element
SlGlk27	ARE	AAACCA	1876	6	Anaerobic responsive element
SlGlk27	AE-box	AGAAACTT	1854	8	Light responsive element
SlGlk27	ERE	ATTTCATA	1277	8	Ethylene responsive element
SlGlk27	WRE3	CCACCT	757	6	Wound responsive element
SlGlk27	Myb	TAACTG	1019	6	Abiotic responsive element
SlGlk27	Myb	TAACTG	1064	6	Abiotic responsive element
SlGlk27	WUN-motif	AAATTTCCT	341	9	Wound responsive element
SlGlk27	WUN-motif	AAATTACT	421	8	Wound responsive element
SlGlk27	I-box	gGATAAGGTG	817	9	Light responsive element
SlGlk27	MBS	CAACTG	794	6	Drought responsive element
SlGlk27	MBS	CAACTG	1521	6	Drought responsive element
SlGlk27	LTR	CCGAAA	24	6	Low temperature responsive element
SlGlk27	GATA-motif	GATAGGA	1912	7	Light responsive element
SlGlk27	ABRE	TACGGTC	98	7	ABA responsive element
SlGlk27	ABRE	ACGTG	1744	5	ABA responsive element
SlGlk27	W box	TTGACC	405	6	Wound responsive element
SlGlk27	Box 4	ATTAAT	444	6	Light responsive element
SlGlk27	STRE	AGGGG	682	5	Stress responsive element
SlGlk27	STRE	AGGGG	1689	5	Stress responsive element
SlGlk27	GARE-motif	TCTGTTG	108	7	GA responsive element
SlGlk27	TCT-motif	TCTTAC	1088	6	Light responsive element
SlGlk27	TCT-motif	TCTTAC	1497	6	Light responsive element
SlGlk28	I-box	atGATAAGGTC	1158	10	Light responsive element
SlGlk28	TGACG/CGTCA-motif	TGACG/CGTCA	1246	5	MeJA responsive element
SlGlk28	LTR	CCGAAA	1371	6	Low temperature responsive element
SlGlk28	ABRE	ACGTG	273	5	ABA responsive element
SlGlk28	ABRE	CACGTG	1326	6	ABA responsive element
SlGlk28	ABRE	ACGTG	1728	5	ABA responsive element
SlGlk28	O2-site	GATGATGTGG	1779	9	Zein responsive element
SlGlk28	Box 4	ATTAAT	83	6	Light responsive element
SlGlk28	Box 4	ATTAAT	557	6	Light responsive element
SlGlk28	Box 4	ATTAAT	1230	6	Light responsive element
SlGlk28	W box	TTGACC	1396	6	Wound responsive element
SlGlk28	AuxRR-core	GGTCCAT	616	7	IAA responsive element
SlGlk28	GT1-motif	GGTTAA	369	6	light responsive element
SlGlk28	TC-rich repeats	GTTTTCTTAC	1903	9	Stress responsive element
SlGlk28	ERE	ATTTTAAA	1019	8	Ethylene responsive element
SlGlk28	ERE	ATTTTAAA	1096	8	Ethylene responsive element
SlGlk28	ERE	ATTTTAAA	1419	8	Ethylene responsive element
SlGlk28	AE-box	AGAAACAA	720	8	Light responsive element
SlGlk29	ERE	ATTTTAAA	1004	8	Ethylene responsive element
SlGlk29	ACA-motif	AATCACAACCATA	1012	12	Light responsive element
SlGlk29	GT1-motif	GGTTAA	600	6	light responsive element
SlGlk29	MBS	CAACTG	264	6	Drought responsive element
SlGlk29	WUN-motif	AAATTACT	1717	8	Wound responsive element
SlGlk29	WUN-motif	AAATTTCTT	1885	9	Wound responsive element
SlGlk29	TGACG/CGTCA-motif	TGACG/CGTCA	1281	5	MeJA responsive element
SlGlk29	Box 4	ATTAAT	334	6	Light responsive element
SlGlk29	Box 4	ATTAAT	810	6	Light responsive element
SlGlk29	Box 4	ATTAAT	1927	6	Light responsive element
SlGlk29	Box 4	ATTAAT	1975	6	Light responsive element
SlGlk29	TCT-motif	TCTTAC	1819	6	Light responsive element
SlGlk29	MRE	AACCTAA	930	7	Light responsive element
SlGlk30	WRE3	CCACCT	327	6	Wound responsive element
SlGlk30	WRE3	CCACCT	905	6	Wound responsive element
SlGlk30	ARE	AAACCA	1569	6	Anaerobic responsive element
SlGlk30	ARE	AAACCA	1822	6	Anaerobic responsive element
SlGlk30	ERE	ATTTTAAA	762	8	Ethylene responsive element
SlGlk30	TC-rich repeats	ATTCTCTAAC	694	9	Stress responsive element
SlGlk30	AE-box	AGAAACTT	859	8	Light responsive element
SlGlk30	TCCC-motif	TCTCCCT	416	7	Light responsive element
SlGlk30	TCCC-motif	TCTCCCT	1464	7	Light responsive element
SlGlk30	TGA-element	AACGAC	423	6	IAA responsive element
SlGlk30	Myb	TAACTG	1368	6	Abiotic responsive element
SlGlk30	ABRE	CACGTG	1498	6	ABA responsive element
SlGlk30	GATA-motif	AAGATAAGATT	150	10	Light responsive element
SlGlk30	Box 4	ATTAAT	35	6	Light responsive element
SlGlk30	Box 4	ATTAAT	1405	6	Light responsive element
SlGlk30	Box 4	ATTAAT	1411	6	Light responsive element
SlGlk30	Box 4	ATTAAT	1583	6	Light responsive element
SlGlk30	STRE	AGGGG	197	5	Stress responsive element
SlGlk30	STRE	AGGGG	986	5	Stress responsive element
SlGlk30	STRE	AGGGG	1022	5	Stress responsive element
SlGlk30	WUN-motif	TTATTACAT	263	9	Wound responsive element
SlGlk30	WUN-motif	AAATTTCTT	1028	9	Wound responsive element
SlGlk30	WUN-motif	AAATTACT	1133	8	Wound responsive element
SlGlk30	TGACG/CGTCA-motif	TGACG/CGTCA	1002	5	MeJA responsive element
SlGlk30	MRE	AACCTAA	1694	7	Light responsive element
SlGlk30	TCA-element	TCAGAAGAGG	1828	9	SA responsive element
SlGlk31	WUN-motif	AAATTTCCT	1241	9	Wound responsive element
SlGlk31	I-box	AAGATAAGGCT	1715	10	Light responsive element
SlGlk31	GA-motif	ATAGATAA	827	8	Light responsive element
SlGlk31	GA-motif	ATAGATAA	893	8	Light responsive element
SlGlk31	O2-site	GATGA(C/T)(A/G)TG(A/G)	1529	8	Zein responsive element
SlGlk31	O2-site	GATGACATGG	1824	9	Zein responsive element
SlGlk31	ABRE	ACGTG	208	5	ABA responsive element
SlGlk31	ABRE	ACGTG	712	5	ABA responsive element
SlGlk31	ABRE	ACGTG	1403	5	ABA responsive element
SlGlk31	GATA-motif	AAGGATAAGG	1362	9	Light responsive element
SlGlk31	STRE	AGGGG	671	5	Stress responsive element
SlGlk31	STRE	AGGGG	1436	5	Stress responsive element
SlGlk31	STRE	AGGGG	1450	5	Stress responsive element
SlGlk31	STRE	AGGGG	1459	5	Stress responsive element
SlGlk31	STRE	AGGGG	1965	5	Stress responsive element
SlGlk31	Box 4	ATTAAT	112	6	Light responsive element
SlGlk31	Box 4	ATTAAT	750	6	Light responsive element
SlGlk31	Box 4	ATTAAT	757	6	Light responsive element
SlGlk31	W box	TTGACC	148	6	Wound responsive element
SlGlk31	W box	TTGACC	1156	6	Wound responsive element
SlGlk31	TCT-motif	TCTTAC	628	6	Light responsive element
SlGlk31	TCT-motif	TCTTAC	1394	6	Light responsive element
SlGlk31	ATCT-motif	AATCTAATCC	1903	9	Light responsive element
SlGlk31	GT1-motif	GGTTAAT	62	7	light responsive element
SlGlk31	GT1-motif	GGTTAA	543	6	light responsive element
SlGlk31	GT1-motif	GGTTAA	1220	6	light responsive element
SlGlk31	GT1-motif	GGTTAA	1283	6	light responsive element
SlGlk31	ERE	ATTTCATA	614	8	Ethylene responsive element
SlGlk31	ERE	ATTTTAAA	1078	8	Ethylene responsive element
SlGlk31	AE-box	AGAAACAA	1517	8	Light responsive element
SlGlk31	AAAC-motif	CAATCAAAACCT	1860	11	light responsive element
SlGlk31	3-AF1 binding site	TAAGAGAGGAA	1125	10	light responsive element
SlGlk32	ERE	ATTTTAAA	1387	8	Ethylene responsive element
SlGlk32	AE-box	AGAAACTT	1282	8	Light responsive element
SlGlk32	GT1-motif	GGTTAA	529	6	light responsive element
SlGlk32	GT1-motif	GGTTAA	569	6	light responsive element
SlGlk32	ARE	AAACCA	313	6	Anaerobic responsive element
SlGlk32	WRE3	CCACCT	1252	6	Wound responsive element
SlGlk32	TGA-element	AACGAC	1327	6	IAA responsive element
SlGlk32	Myb	TAACTG	832	6	Abiotic responsive element
SlGlk32	MBS	CAACTG	1588	6	Drought responsive element
SlGlk32	I-box	GTATAAGGCC	547	9	Light responsive element
SlGlk32	I-box	gGATAAGGTG	1154	9	Light responsive element
SlGlk32	TGACG/CGTCA-motif	TGACG/CGTCA	1013	5	MeJA responsive element
SlGlk32	STRE	AGGGG	1728	5	Stress responsive element
SlGlk32	Box 4	ATTAAT	581	6	Light responsive element
SlGlk32	W box	TTGACC	1205	6	Wound responsive element
SlGlk32	ABRE	CACGTG	416	6	ABA responsive element
SlGlk32	ABRE	ACGTG	1811	5	ABA responsive element
SlGlk32	O2-site	GTTGACGTGA	1624	9	Zein responsive element
SlGlk32	GA-motif	ATAGATAA	722	8	Light responsive element
SlGlk32	TCT-motif	TCTTAC	436	6	Light responsive element
SlGlk32	G-box	GCCACGTGGA	212	9	Light responsive element
SlGlk32	ACE	CTAACGTATT	1860	9	Light responsive element
SlGlk33	G-box	CACGAC	929	6	Light responsive element
SlGlk33	TGA-box	TGACGTAA	225	8	IAA responsive element
SlGlk33	TCA-element	CCATCTTTTT	1970	9	SA responsive element
SlGlk33	AuxRE	TGTCTCAATAAG	1663	11	IAA responsive element
SlGlk33	TCT-motif	TCTTAC	1791	6	Light responsive element
SlGlk33	ACE	GACACGTATG	746	9	Light responsive element
SlGlk33	TGACG/CGTCA-motif	TGACG/CGTCA	834	5	MeJA responsive element
SlGlk33	WUN-motif	AAATTTCTT	41	9	Wound responsive element
SlGlk33	WUN-motif	AAATTACT	347	8	Wound responsive element
SlGlk33	WUN-motif	AAATTACT	1900	8	Wound responsive element
SlGlk33	MBS	CAACTG	1862	6	Drought responsive element
SlGlk33	LTR	CCGAAA	1144	6	Low temperature responsive element
SlGlk33	ABRE	ACGTG	139	5	ABA responsive element
SlGlk33	ABRE	ACGTG	793	5	ABA responsive element
SlGlk33	ABRE	ACGTG	920	5	ABA responsive element
SlGlk33	ABRE	AACCCGG	945	7	ABA responsive element
SlGlk33	ABRE	ACGTG	1516	5	ABA responsive element
SlGlk33	Box 4	ATTAAT	469	6	Light responsive element
SlGlk33	Box 4	ATTAAT	1034	6	Light responsive element
SlGlk33	Box 4	ATTAAT	1176	6	Light responsive element
SlGlk33	STRE	AGGGG	1347	5	Stress responsive element
SlGlk33	STRE	AGGGG	1363	5	Stress responsive element
SlGlk33	ARE	AAACCA	1500	6	Anaerobic responsive element
SlGlk33	ARE	AAACCA	1545	6	Anaerobic responsive element
SlGlk33	GT1-motif	GGTTAA	382	6	light responsive element
SlGlk33	GT1-motif	GGTTAA	453	6	light responsive element
SlGlk33	ERE	ATTTTAAA	119	8	Ethylene responsive element
SlGlk33	ERE	ATTTTAAA	306	8	Ethylene responsive element
SlGlk33	ERE	ATTTTAAA	570	8	Ethylene responsive element
SlGlk33	WRE3	CCACCT	494	6	Wound responsive element
SlGlk34	chs-CMA1a	TTACTTAA	1660	8	Light responsive element
SlGlk34	ERE	ATTTTAAA	1198	8	Ethylene responsive element
SlGlk34	ERE	ATTTTAAA	1971	8	Ethylene responsive element
SlGlk34	WUN-motif	AAATTACT	1698	8	Wound responsive element
SlGlk35	Box 4	ATTAAT	939	6	Light responsive element
SlGlk35	Box 4	ATTAAT	1266	6	Light responsive element
SlGlk35	Box 4	ATTAAT	1342	6	Light responsive element
SlGlk35	Box 4	ATTAAT	1681	6	Light responsive element
SlGlk35	LTR	CCGAAA	103	6	Low temperature responsive element
SlGlk35	LTR	CCGAAA	497	6	Low temperature responsive element
SlGlk35	AuxRR-core	GGTCCAT	505	7	IAA responsive element
SlGlk35	GATA-motif	AAGGATAAGG	1501	9	Light responsive element
SlGlk35	ERE	ATTTCATA	224	8	Ethylene responsive element
SlGlk35	ERE	ATTTTAAA	1146	8	Ethylene responsive element
SlGlk35	TATC-box	TATCCCA	301	7	GA responsive element
SlGlk35	I-box	TGATAATGT	252	9	Light responsive element
SlGlk35	MBS	CAACTG	726	6	Drought responsive element
SlGlk35	TC-rich repeats	ATTCTCTAAC	700	9	Stress responsive element
SlGlk35	TC-rich repeats	GTTTTCTTAC	1953	9	Stress responsive element
SlGlk35	Myb	TAACTG	146	6	Abiotic responsive element
SlGlk35	W box	TTGACC	1637	6	Wound responsive element
SlGlk35	WUN-motif	CCATTTCAA	1467	9	Wound responsive element
SlGlk35	G-box	CACGAC	771	6	Light responsive element
SlGlk35	G-box	CACGAC	786	6	Light responsive element
SlGlk35	GA-motif	ATAGATAA	1791	8	Light responsive element
SlGlk35	GA-motif	ATAGATAA	1935	8	Light responsive element
SlGlk35	MRE	AACCTAA	90	7	Light responsive element
SlGlk35	MRE	AACCTAA	602	7	Light responsive element
SlGlk35	GT1-motif	GTGTGTGAA	43	9	light responsive element
SlGlk35	ABRE	ACGTG	67	5	ABA responsive element
SlGlk36	GARE-motif	TCTGTTG	1637	7	GA responsive element
SlGlk36	Box 4	ATTAAT	956	6	Light responsive element
SlGlk36	Box 4	ATTAAT	1233	6	Light responsive element
SlGlk36	Box 4	ATTAAT	1264	6	Light responsive element
SlGlk36	Box 4	ATTAAT	1278	6	Light responsive element
SlGlk36	Box 4	ATTAAT	1376	6	Light responsive element
SlGlk36	Box 4	ATTAAT	1460	6	Light responsive element
SlGlk36	ARE	AAACCA	82	6	Anaerobic responsive element
SlGlk36	ARE	AAACCA	917	6	Anaerobic responsive element
SlGlk36	TGACG/CGTCA-motif	TGACG/CGTCA	181	5	MeJA responsive element
SlGlk36	TGACG/CGTCA-motif	TGACG/CGTCA	1289	5	MeJA responsive element
SlGlk36	ERE	ATTTTAAA	64	8	Ethylene responsive element
SlGlk36	ERE	ATTTCATA	614	8	Ethylene responsive element
SlGlk36	ERE	ATTTCATA	1496	8	Ethylene responsive element
SlGlk36	GA-motif	ATAGATAA	127	8	Light responsive element
SlGlk36	P-box	CCTTTTG	659	7	GA responsive element
SlGlk36	P-box	CAACAAACCCCTT	1835	12	Light responsive element
SlGlk36	GT1-motif	GGTTAAT	847	7	light responsive element
SlGlk36	GT1-motif	GGTTAAT	1148	7	light responsive element
SlGlk36	AT1-motif	AATTATTTTTTATT	39	13	Light responsive element
SlGlk37	TCA-element	CCATCTTTTT	1558	9	SA responsive element
SlGlk37	ABRE	ACGTG	705	5	ABA responsive element
SlGlk37	GT1-motif	GGTTAA	920	6	light responsive element
SlGlk37	GT1-motif	GGTTAA	1513	6	light responsive element
SlGlk37	GT1-motif	GGTTAA	1587	6	light responsive element
SlGlk37	WRE3	CCACCT	1624	6	Wound responsive element
SlGlk37	WUN-motif	AAATTACT	20	8	Wound responsive element
SlGlk37	WUN-motif	CCATTTCAA	1798	9	Wound responsive element
SlGlk37	ERE	ATTTTAAA	374	8	Ethylene responsive element
SlGlk37	ERE	ATTTTAAA	952	8	Ethylene responsive element
SlGlk37	Pc-CMA2b	AGATAATACCCTTTA	348	14	Light responsive element
SlGlk37	AE-box	AGAAACAA	1664	8	Light responsive element
SlGlk37	AE-box	AGAAACAA	1818	8	Light responsive element
SlGlk37	ARE	AAACCA	1472	6	Anaerobic responsive element
SlGlk37	STRE	AGGGG	230	5	Stress responsive element
SlGlk37	AuxRR-core	GGTCCAT	133	7	IAA responsive element
SlGlk37	LTR	CCGAAA	1357	6	Low temperature responsive element
SlGlk37	Box 4	ATTAAT	178	6	Light responsive element
SlGlk37	Box 4	ATTAAT	272	6	Light responsive element
SlGlk37	Box 4	ATTAAT	576	6	Light responsive element
SlGlk37	Box 4	ATTAAT	628	6	Light responsive element
SlGlk37	Box 4	ATTAAT	885	6	Light responsive element
SlGlk37	Box 4	ATTAAT	1349	6	Light responsive element
SlGlk37	Box 4	ATTAAT	1372	6	Light responsive element
SlGlk37	Box 4	ATTAAT	1862	6	Light responsive element
SlGlk38	ABRE	ACGTG	841	5	ABA responsive element
SlGlk38	ABRE	ACGTG	1161	5	ABA responsive element
SlGlk38	ABRE	ACGTG	1234	5	ABA responsive element
SlGlk38	ABRE	ACGTG	2010	5	ABA responsive element
SlGlk38	GA-motif	ATAGATAA	154	8	Light responsive element
SlGlk38	GA-motif	ATAGATAA	220	8	Light responsive element
SlGlk38	GT1-motif	GGTTAA	356	6	light responsive element
SlGlk38	P-box	CCTTTTG	521	7	GA responsive element
SlGlk38	W box	TTGACC	343	6	Wound responsive element
SlGlk38	W box	TTGACC	404	6	Wound responsive element
SlGlk38	WUN-motif	CAATTACAT	1075	9	Wound responsive element
SlGlk38	WUN-motif	AAATTACTA	1377	9	Wound responsive element
SlGlk38	Gap-box	CAAATGAA(A/G)A	1830	9.5	Light responsive element
SlGlk38	ERE	ATTTCATA	908	8	Ethylene responsive element
SlGlk38	ERE	ATTTTAAA	1336	8	Ethylene responsive element
SlGlk38	ERE	ATTTTAAA	1609	8	Ethylene responsive element
SlGlk38	ERE	ATTTTAAA	1793	8	Ethylene responsive element
SlGlk38	ERE	ATTTTAAA	1852	8	Ethylene responsive element
SlGlk38	ERE	ATTTTAAA	1951	8	Ethylene responsive element
SlGlk38	TCT-motif	TCTTAC	928	6	Light responsive element
SlGlk38	TCT-motif	TCTTAC	1409	6	Light responsive element
SlGlk38	ARE	AAACCA	362	6	Anaerobic responsive element
SlGlk38	ARE	AAACCA	1889	6	Anaerobic responsive element
SlGlk38	GATA-motif	AAGGATAAGG	309	9	Light responsive element
SlGlk38	TCCC-motif	TCTCCCT	758	7	Light responsive element
SlGlk38	STRE	AGGGG	33	5	Stress responsive element
SlGlk38	STRE	AGGGG	327	5	Stress responsive element
SlGlk38	ATCT-motif	AATCTAATCC	1393	9	Light responsive element
SlGlk38	LTR	CCGAAA	71	6	Low temperature responsive element
SlGlk38	Box 4	ATTAAT	964	6	Light responsive element
SlGlk38	Box 4	ATTAAT	1195	6	Light responsive element
SlGlk38	Box 4	ATTAAT	1440	6	Light responsive element
SlGlk38	Box 4	ATTAAT	1453	6	Light responsive element
SlGlk38	Box 4	ATTAAT	1631	6	Light responsive element
SlGlk38	ACE	GACACGTATG	1733	9	Light responsive element
SlGlk39	TGACG/CGTCA-motif	TGACG/CGTCA	722	5	MeJA responsive element
SlGlk39	ERE	ATTTCATA	269	8	Ethylene responsive element
SlGlk39	ERE	ATTTTAAA	777	8	Ethylene responsive element
SlGlk39	ERE	ATTTTAAA	836	8	Ethylene responsive element
SlGlk39	ERE	ATTTTAAA	849	8	Ethylene responsive element
SlGlk39	ERE	ATTTTAAA	1426	8	Ethylene responsive element
SlGlk39	ERE	ATTTCATA	1462	8	Ethylene responsive element
SlGlk39	STRE	AGGGG	970	5	Stress responsive element
SlGlk39	STRE	AGGGG	1578	5	Stress responsive element
SlGlk39	STRE	AGGGG	1912	5	Stress responsive element
SlGlk39	TCCC-motif	TCTCCCT	1773	7	Light responsive element
SlGlk39	Box 4	ATTAAT	487	6	Light responsive element
SlGlk39	Box 4	ATTAAT	1147	6	Light responsive element
SlGlk39	Box 4	ATTAAT	1151	6	Light responsive element
SlGlk39	Box 4	ATTAAT	1443	6	Light responsive element
SlGlk39	ABRE	CACGTG	364	6	ABA responsive element
SlGlk39	ABRE	ACGTG	916	5	ABA responsive element
SlGlk39	ABRE	ACGTG	1262	5	ABA responsive element
SlGlk39	ABRE	ACGTG	1993	5	ABA responsive element
SlGlk39	MBSI	aaaAaaC(G/C)GTTA	1061	10.5	Flavonoid resposive element
SlGlk39	Myb	TAACTG	316	6	Abiotic responsive element
SlGlk40	GARE-motif	TCTGTTG	1793	7	GA responsive element
SlGlk40	Box 4	ATTAAT	50	6	Light responsive element
SlGlk40	Box 4	ATTAAT	125	6	Light responsive element
SlGlk40	Box 4	ATTAAT	516	6	Light responsive element
SlGlk40	TCT-motif	TCTTAC	1111	6	Light responsive element
SlGlk40	ATCT-motif	AATCTAATCC	1902	9	Light responsive element
SlGlk40	STRE	AGGGG	1253	5	Stress responsive element
SlGlk40	STRE	AGGGG	1261	5	Stress responsive element
SlGlk40	STRE	AGGGG	1276	5	Stress responsive element
SlGlk40	STRE	AGGGG	1925	5	Stress responsive element
SlGlk40	box S	AGCCACC	103	7	Wound responsive element
SlGlk40	WUN-motif	AAATTACTA	490	9	Wound responsive element
SlGlk40	WRE3	CCACCT	1306	6	Wound responsive element
SlGlk40	Gap-box	CAAATGAA(A/G)A	1035	9.5	Light responsive element
SlGlk40	TGA-element	AACGAC	1326	6	IAA responsive element
SlGlk40	ABRE	ACGTG	779	5	ABA responsive element
SlGlk40	ABRE	ACGTG	1010	5	ABA responsive element
SlGlk40	ABRE	ACGTG	1130	5	ABA responsive element
SlGlk41	TC-rich repeats	GTTTTCTTAC	1941	9	Stress responsive element
SlGlk41	WUN-motif	AAATTACT	458	8	Wound responsive element
SlGlk41	WUN-motif	AAATTTCCT	656	9	Wound responsive element
SlGlk41	W box	TTGACC	1289	6	Wound responsive element
SlGlk41	GT1-motif	GGTTAA	960	6	light responsive element
SlGlk41	P-box	CCTTTTG	895	7	GA responsive element
SlGlk41	TGA-element	AACGAC	912	6	IAA responsive element
SlGlk41	LTR	CCGAAA	555	6	Low temperature responsive element
SlGlk41	Box 4	ATTAAT	249	6	Light responsive element
SlGlk41	Box 4	ATTAAT	817	6	Light responsive element
SlGlk41	Box 4	ATTAAT	1041	6	Light responsive element
SlGlk41	Box 4	ATTAAT	1300	6	Light responsive element
SlGlk41	Box 4	ATTAAT	1731	6	Light responsive element
SlGlk41	Box 4	ATTAAT	1739	6	Light responsive element
SlGlk41	ARE	AAACCA	1221	6	Anaerobic responsive element
SlGlk41	GATA-motif	AAGGATAAGG	72	9	Light responsive element
SlGlk41	STRE	AGGGG	438	5	Stress responsive element
SlGlk41	STRE	AGGGG	1903	5	Stress responsive element
SlGlk41	STRE	AGGGG	1918	5	Stress responsive element
SlGlk41	ERE	ATTTTAAA	367	8	Ethylene responsive element
SlGlk41	ERE	ATTTTAAA	1107	8	Ethylene responsive element
SlGlk41	TCT-motif	TCTTAC	310	6	Light responsive element
SlGlk41	TCT-motif	TCTTAC	1421	6	Light responsive element
SlGlk42	TCT-motif	TCTTAC	637	6	Light responsive element
SlGlk42	TCT-motif	TCTTAC	1329	6	Light responsive element
SlGlk42	MBS	CAACTG	1661	6	Drought responsive element
SlGlk42	GATA-motif	AAGATAAGATT	5	10	Light responsive element
SlGlk42	ARE	AAACCA	848	6	Anaerobic responsive element
SlGlk42	ARE	AAACCA	1690	6	Anaerobic responsive element
SlGlk42	ATCT-motif	AATCTAATCC	1245	9	Light responsive element
SlGlk42	STRE	AGGGG	290	5	Stress responsive element
SlGlk42	STRE	AGGGG	991	5	Stress responsive element
SlGlk42	STRE	AGGGG	1042	5	Stress responsive element
SlGlk42	box S	AGCCACC	800	7	Wound responsive element
SlGlk42	TCCC-motif	TCTCCCT	1070	7	Light responsive element
SlGlk42	GARE-motif	TCTGTTG	54	7	GA responsive element
SlGlk42	GARE-motif	TCTGTTG	301	7	GA responsive element
SlGlk42	GARE-motif	TCTGTTG	575	7	GA responsive element
SlGlk42	ACE	GCGACGTACC	1810	9	Light responsive element
SlGlk42	Box 4	ATTAAT	1393	6	Light responsive element
SlGlk42	TCA-element	CCATCTTTTT	423	9	SA responsive element
SlGlk42	TCA-element	CCATCTTTTT	1270	9	SA responsive element
SlGlk42	ABRE	ACGTG	1335	5	ABA responsive element
SlGlk42	ABRE	CACGTG	1733	6	ABA responsive element
SlGlk42	MRE	AACCTAA	552	7	Light responsive element
SlGlk42	Myb	TAACTG	402	6	Abiotic responsive element
SlGlk42	Myb	TAACTG	746	6	Abiotic responsive element
SlGlk42	Myb	TAACTG	1354	6	Abiotic responsive element
SlGlk42	WRE3	CCACCT	122	6	Wound responsive element
SlGlk42	TC-rich repeats	GTTTTCTTAC	1684	9	Stress responsive element
SlGlk43	Box 4	ATTAAT	569	6	Light responsive element
SlGlk43	Box 4	ATTAAT	1221	6	Light responsive element
SlGlk43	Box 4	ATTAAT	1394	6	Light responsive element
SlGlk43	Box 4	ATTAAT	1446	6	Light responsive element
SlGlk43	Box 4	ATTAAT	1662	6	Light responsive element
SlGlk43	Box 4	ATTAAT	1847	6	Light responsive element
SlGlk43	Box 4	ATTAAT	1952	6	Light responsive element
SlGlk43	O2-site	GATGATGTGG	72	10	Zein responsive element
SlGlk43	O2-site	GATGA(C/T)(A/G)TG(A/G)	95	8	Zein responsive element
SlGlk43	GATA-motif	GATAGGA	538	7	Light responsive element
SlGlk43	ARE	AAACCA	373	6	Anaerobic responsive element
SlGlk43	ARE	AAACCA	924	6	Anaerobic responsive element
SlGlk43	ARE	AAACCA	1975	6	Anaerobic responsive element
SlGlk43	STRE	AGGGG	1173	5	Stress responsive element
SlGlk43	TCCC-motif	TCTCCCT	448	7	Light responsive element
SlGlk43	ERE	ATTTTAAA	1342	8	Ethylene responsive element
SlGlk43	ERE	ATTTTAAA	1552	8	Ethylene responsive element
SlGlk43	TGACG/CGTCA-motif	TGACG/CGTCA	504	5	MeJA responsive element
SlGlk43	TGACG/CGTCA-motif	TGACG/CGTCA	845	5	MeJA responsive element
SlGlk43	TGACG/CGTCA-motif	TGACG/CGTCA	1993	5	MeJA responsive element
SlGlk43	MBS	CAACTG	1987	6	Drought responsive element
SlGlk43	I-box	TAGATAACC	310	9	Light responsive element
SlGlk43	I-box	gGATAAGGTG	345	9	Light responsive element
SlGlk43	AE-box	AGAAACAA	1923	8	Light responsive element
SlGlk43	Myb	TAACTG	213	6	Abiotic responsive element
SlGlk43	Myb	TAACTG	515	6	Abiotic responsive element
SlGlk43	MRE	AACCTAA	1891	7	Light responsive element
SlGlk43	TCA-element	TCAGAAGAGG	232	9	SA responsive element
SlGlk43	TCA-element	TCAGAAGAGG	1006	9	SA responsive element
SlGlk43	ABRE	ACGTG	168	5	ABA responsive element
SlGlk44	box S	AGCCACC	1239	7	Wound responsive element
SlGlk44	STRE	AGGGG	214	5	Stress responsive element
SlGlk44	STRE	AGGGG	975	5	Stress responsive element
SlGlk44	STRE	AGGGG	1221	5	Stress responsive element
SlGlk44	ARE	AAACCA	357	6	Anaerobic responsive element
SlGlk44	ARE	AAACCA	1103	6	Anaerobic responsive element
SlGlk44	MBS	CAACTG	1466	6	Drought responsive element
SlGlk44	AE-box	AGAAACAA	1728	8	Light responsive element
SlGlk44	TCT-motif	TCTTAC	1512	6	Light responsive element
SlGlk44	ERE	ATTTTAAA	1770	8	Ethylene responsive element
SlGlk44	Box 4	ATTAAT	315	6	Light responsive element
SlGlk44	Box 4	ATTAAT	923	6	Light responsive element
SlGlk44	GARE-motif	TCTGTTG	1128	7	GA responsive element
SlGlk44	GT1-motif	GGTTAA	1656	6	light responsive element
SlGlk44	P-box	CCTTTTG	535	7	GA responsive element
SlGlk44	MRE	AACCTAA	253	7	Light responsive element
SlGlk44	MRE	AACCTAA	885	7	Light responsive element
SlGlk44	TCA-element	CCATCTTTTT	55	9	SA responsive element
SlGlk44	TCA-element	CCATCTTTTT	1153	9	SA responsive element
SlGlk44	TC-rich repeats	ATTCTCTAAC	289	9	Stress responsive element
SlGlk44	WRE3	CCACCT	590	6	Wound responsive element
SlGlk44	WUN-motif	TAATTACTC	1439	9	Wound responsive element
SlGlk44	Myb	TAACTG	67	6	Abiotic responsive element
SlGlk44	Myb	TAACTG	437	6	Abiotic responsive element
SlGlk45	WUN-motif	AAATTTCTT	2003	9	Wound responsive element
SlGlk45	GT1-motif	GGTTAA	312	6	light responsive element
SlGlk45	GT1-motif	GGTTAA	1529	6	light responsive element
SlGlk45	ACE	GACACGTATG	295	9	Light responsive element
SlGlk45	Box 4	ATTAAT	347	6	Light responsive element
SlGlk45	Box 4	ATTAAT	586	6	Light responsive element
SlGlk45	Box 4	ATTAAT	716	6	Light responsive element
SlGlk45	Box 4	ATTAAT	976	6	Light responsive element
SlGlk45	ERE	ATTTTAAA	226	8	Ethylene responsive element
SlGlk45	ERE	ATTTTAAA	260	8	Ethylene responsive element
SlGlk45	ERE	ATTTCATA	654	8	Ethylene responsive element
SlGlk45	TCT-motif	TCTTAC	553	6	Light responsive element
SlGlk45	AE-box	AGAAACAA	627	8	Light responsive element
SlGlk45	AE-box	AGAAACAA	1673	8	Light responsive element
SlGlk45	AE-box	AGAAACTT	1699	8	Light responsive element
SlGlk45	ARE	AAACCA	1874	6	Anaerobic responsive element
SlGlk45	GATA-motif	GATAGGG	1407	7	Light responsive element
SlGlk45	STRE	AGGGG	159	5	Stress responsive element
SlGlk45	STRE	AGGGG	1281	5	Stress responsive element
SlGlk46	WUN-motif	AAATTACT	802	8	Wound responsive element
SlGlk46	WUN-motif	AAATTTCCT	1950	9	Wound responsive element
SlGlk46	GA-motif	ATAGATAA	346	8	Light responsive element
SlGlk46	GT1-motif	GGTTAAT	952	7	light responsive element
SlGlk46	GT1-motif	GGTTAAT	1835	7	light responsive element
SlGlk46	GARE-motif	TCTGTTG	615	7	GA responsive element
SlGlk46	Box 4	ATTAAT	1262	6	Light responsive element
SlGlk46	Box 4	ATTAAT	1886	6	Light responsive element
SlGlk46	GATA-motif	AAGATAAGATT	864	10	Light responsive element
SlGlk46	GATA-motif	AAGATAAGATT	897	11	Light responsive element
SlGlk46	STRE	AGGGG	1662	5	Stress responsive element
SlGlk46	STRE	AGGGG	1669	5	Stress responsive element
SlGlk46	TGACG/CGTCA-motif	TGACG/CGTCA	1311	5	MeJA responsive element
SlGlk46	ERE	ATTTTAAA	725	8	Ethylene responsive element
SlGlk46	ERE	ATTTCATA	1166	8	Ethylene responsive element
SlGlk46	ERE	ATTTTAAA	1607	8	Ethylene responsive element
SlGlk46	TCT-motif	TCTTAC	904	6	Light responsive element
SlGlk46	TCT-motif	TCTTAC	929	6	Light responsive element
SlGlk47	WUN-motif	CCATTTCAA	186	9	Wound responsive element
SlGlk47	W box	TTGACC	1112	6	Wound responsive element
SlGlk47	TCA-element	CCATCTTTTT	1558	9	SA responsive element
SlGlk47	TCA-element	TCAGAAGAGG	1985	9	SA responsive element
SlGlk47	ABRE	ACGTG	1232	5	ABA responsive element
SlGlk47	TGA-element	AACGAC	1059	6	IAA responsive element
SlGlk47	P-box	CCTTTTG	1917	7	GA responsive element
SlGlk47	MRE	AACCTAA	954	7	Light responsive element
SlGlk47	GARE-motif	TCTGTTG	1823	7	GA responsive element
SlGlk47	Box 4	ATTAAT	1105	6	Light responsive element
SlGlk47	Box 4	ATTAAT	1438	6	Light responsive element
SlGlk47	Box 4	ATTAAT	1607	6	Light responsive element
SlGlk47	Box 4	ATTAAT	1789	6	Light responsive element
SlGlk47	LTR	CCGAAA	483	6	Low temperature responsive element
SlGlk47	LTR	CCGAAA	916	6	Low temperature responsive element
SlGlk47	TGACG/CGTCA-motif	TGACG/CGTCA	742	5	MeJA responsive element
SlGlk47	ERE	ATTTTAAA	1535	8	Ethylene responsive element
SlGlk47	TCT-motif	TCTTAC	23	6	Light responsive element
SlGlk47	TCT-motif	TCTTAC	615	6	Light responsive element
SlGlk47	TCT-motif	TCTTAC	2005	6	Light responsive element
SlGlk47	GATA-motif	GATAGGG	880	7	Light responsive element
SlGlk47	ARE	AAACCA	596	6	Anaerobic responsive element
SlGlk47	ARE	AAACCA	1864	6	Anaerobic responsive element
SlGlk47	STRE	AGGGG	724	5	Stress responsive element
SlGlk47	STRE	AGGGG	765	5	Stress responsive element
SlGlk47	STRE	AGGGG	1186	5	Stress responsive element
SlGlk48	STRE	AGGGG	220	5	Stress responsive element
SlGlk48	STRE	AGGGG	828	5	Stress responsive element
SlGlk48	TCCC-motif	TCTCCCT	1979	7	Light responsive element
SlGlk48	ARE	AAACCA	262	6	Anaerobic responsive element
SlGlk48	ARE	AAACCA	1369	6	Anaerobic responsive element
SlGlk48	ARE	AAACCA	1491	6	Anaerobic responsive element
SlGlk48	AE-box	AGAAACAA	516	8	Light responsive element
SlGlk48	TCT-motif	TCTTAC	1229	6	Light responsive element
SlGlk48	ERE	ATTTCATA	1125	8	Ethylene responsive element
SlGlk48	Box 4	ATTAAT	454	6	Light responsive element
SlGlk48	LTR	CCGAAA	811	6	Low temperature responsive element
SlGlk48	GT1-motif	GGTTAAT	180	7	light responsive element
SlGlk48	P-box	CCTTTTG	731	7	GA responsive element
SlGlk48	ABRE	ACGTG	668	5	ABA responsive element
SlGlk48	ABRE	ACGTG	721	5	ABA responsive element
SlGlk48	G-box	TAACACGTAG	130	9	Light responsive element
SlGlk48	WUN-motif	AAATTACT	52	8	Wound responsive element
SlGlk48	WUN-motif	TTATTACAT	1719	9	Wound responsive element
SlGlk49	GT1-motif	GGTTAA	705	6	light responsive element
SlGlk49	GT1-motif	GGTTAA	1874	6	light responsive element
SlGlk49	GT1-motif	GGTTAA	1998	6	light responsive element
SlGlk49	P-box	CCTTTTG	892	7	GA responsive element
SlGlk49	LAMP-element	CTTTATCA	1612	8	Light responsive element
SlGlk49	G-box	GCCACGTGGA	818	9	Light responsive element
SlGlk49	WRE3	CCACCT	803	6	Wound responsive element
SlGlk49	WRE3	CCACCT	1484	6	Wound responsive element
SlGlk49	Myb	TAACTG	932	6	Abiotic responsive element
SlGlk49	Myb	TAACTG	1227	6	Abiotic responsive element
SlGlk49	STRE	AGGGG	1496	5	Stress responsive element
SlGlk49	GATA-motif	AAGATAAGATT	1641	10	Light responsive element
SlGlk49	ARE	AAACCA	1029	6	Anaerobic responsive element
SlGlk49	ARE	AAACCA	1700	6	Anaerobic responsive element
SlGlk49	ARE	AAACCA	1798	6	Anaerobic responsive element
SlGlk49	TCT-motif	TCTTAC	1154	6	Light responsive element
SlGlk49	TCT-motif	TCTTAC	1561	6	Light responsive element
SlGlk49	TCT-motif	TCTTAC	1596	6	Light responsive element
SlGlk49	ERE	ATTTTAAA	958	8	Ethylene responsive element
SlGlk49	Box 4	ATTAAT	349	6	Light responsive element
SlGlk49	Box 4	ATTAAT	643	6	Light responsive element
SlGlk49	O2-site	GATGATGTGG	537	9	Zein responsive element
SlGlk49	LTR	CCGAAA	1174	6	Low temperature responsive element
SlGlk49	GC-motif	CCCCCG	1939	6	Anaerobic responsive element
SlGlk50	W box	TTGACC	683	6	Wound responsive element
SlGlk50	W box	TTGACC	698	6	Wound responsive element
SlGlk50	WUN-motif	AAATTACT	238	8	Wound responsive element
SlGlk50	ATC-motif	AGTAATCT	271	8	Light responsive element
SlGlk50	MRE	AACCTAA	735	7	Light responsive element
SlGlk50	GT1-motif	GGTTAA	842	6	light responsive element
SlGlk50	GT1-motif	GGTTAA	1139	6	light responsive element
SlGlk50	TGA-element	AACGAC	2002	6	IAA responsive element
SlGlk50	TCA-element	CCATCTTTTT	918	9	SA responsive element
SlGlk50	Box 4	ATTAAT	1130	6	Light responsive element
SlGlk50	Box 4	ATTAAT	1374	6	Light responsive element
SlGlk50	Box 4	ATTAAT	1445	6	Light responsive element
SlGlk50	GARE-motif	TCTGTTG	881	7	GA responsive element
SlGlk50	AE-box	AGAAACTT	978	8	Light responsive element
SlGlk50	I-box	AGATAAGG	1688	8	Light responsive element
SlGlk50	ERE	ATTTTAAA	357	8	Ethylene responsive element
SlGlk50	ERE	ATTTTAAA	411	8	Ethylene responsive element
SlGlk50	ERE	ATTTTAAA	949	8	Ethylene responsive element
SlGlk50	ERE	ATTTTAAA	1709	8	Ethylene responsive element
SlGlk50	TGACG/CGTCA-motif	TGACG/CGTCA	187	5	MeJA responsive element
SlGlk50	TGACG/CGTCA-motif	TGACG/CGTCA	491	5	MeJA responsive element
SlGlk50	TGACG/CGTCA-motif	TGACG/CGTCA	573	5	MeJA responsive element
SlGlk51	AE-box	AGAAACTT	547	8	Light responsive element
SlGlk51	AE-box	AGAAACAA	1785	8	Light responsive element
SlGlk51	AE-box	AGAAACAA	2003	8	Light responsive element
SlGlk51	MBS	CAACTG	1328	6	Drought responsive element
SlGlk51	MBS	CAACTG	1466	6	Drought responsive element
SlGlk51	MBS	CAACTG	1513	6	Drought responsive element
SlGlk51	MBS	CAACTG	1560	6	Drought responsive element
SlGlk51	I-box	AAGATAAGGCT	661	10	Light responsive element
SlGlk51	ERE	ATTTTAAA	458	8	Ethylene responsive element
SlGlk51	ARE	AAACCA	726	6	Anaerobic responsive element
SlGlk51	ARE	AAACCA	1626	6	Anaerobic responsive element
SlGlk51	ARE	AAACCA	1683	6	Anaerobic responsive element
SlGlk51	ABRE	GACACGTGGC	517	9	ABA responsive element
SlGlk51	TGA-element	AACGAC	1764	6	IAA responsive element
SlGlk51	GT1-motif	GGTTAA	1919	6	light responsive element
SlGlk51	GA-motif	ATAGATAA	1277	8	Light responsive element
SlGlk51	TGA-box	TGACGTAA	87	8	IAA responsive element
SlGlk51	Myb	TAACTG	1016	6	Abiotic responsive element
SlGlk51	Myb	TAACTG	1425	6	Abiotic responsive element
SlGlk51	WRE3	CCACCT	1053	6	Wound responsive element
SlGlk51	W box	TTGACC	343	6	Wound responsive element
SlGlk51	W box	TTGACC	1338	6	Wound responsive element
SlGlk52	AE-box	AGAAACAA	1660	8	Light responsive element
SlGlk52	I-box	TGATAATGT	396	9	Light responsive element
SlGlk52	MBS	CAACTG	253	6	Drought responsive element
SlGlk52	MBS	CAACTG	493	6	Drought responsive element
SlGlk52	ARE	AAACCA	623	6	Anaerobic responsive element
SlGlk52	ARE	AAACCA	768	6	Anaerobic responsive element
SlGlk52	ARE	AAACCA	1444	6	Anaerobic responsive element
SlGlk52	ARE	AAACCA	1551	6	Anaerobic responsive element
SlGlk52	AAAC-motif	CAATCAAAACCT	1323	11	light responsive element
SlGlk52	GATA-motif	AAGATAAGATT	1678	10	Light responsive element
SlGlk52	GATA-motif	AAGATAAGATT	1801	10	Light responsive element
SlGlk52	GATA-motif	AAGATAAGATT	1917	10	Light responsive element
SlGlk52	STRE	AGGGG	1597	5	Stress responsive element
SlGlk52	STRE	AGGGG	2012	5	Stress responsive element
SlGlk52	AuxRR-core	GGTCCAT	1849	7	IAA responsive element
SlGlk52	O2-site	GATGACATGG	85	9	Zein responsive element
SlGlk52	TGA-element	AACGAC	228	6	IAA responsive element
SlGlk52	W box	TTGACC	1784	6	Wound responsive element
SlGlk52	WUN-motif	AAATTTCTT	296	9	Wound responsive element
SlGlk52	WRE3	CCACCT	1511	6	Wound responsive element
SlGlk53	Box 4	ATTAAT	1260	6	Light responsive element
SlGlk53	GARE-motif	TCTGTTG	1157	7	GA responsive element
SlGlk53	TCCC-motif	TCTCCCT	732	7	Light responsive element
SlGlk53	STRE	AGGGG	335	5	Stress responsive element
SlGlk53	ARE	AAACCA	1186	6	Anaerobic responsive element
SlGlk53	TCT-motif	TCTTAC	1876	6	Light responsive element
SlGlk53	TCT-motif	TCTTAC	1964	6	Light responsive element
SlGlk53	I-box	cCATATCCAAT	222	10	Light responsive element
SlGlk53	ERE	ATTTCATA	342	8	Ethylene responsive element
SlGlk53	ERE	ATTTTAAA	551	8	Ethylene responsive element
SlGlk53	Gap-box	CAAATGAA(A/G)A	456	9.5	Light responsive element
SlGlk53	Gap-box	CAAATGAA(A/G)A	778	9	Light responsive element
SlGlk53	Gap-box	CAAATGAA(A/G)A	1717	9.5	Light responsive element
SlGlk53	G-box	CACGAC	839	6	Light responsive element
SlGlk53	W box	TTGACC	1758	6	Wound responsive element
SlGlk53	P-box	CCTTTTG	351	7	GA responsive element
SlGlk53	P-box	CCTTTTG	1700	7	GA responsive element
SlGlk53	GT1-motif	GGTTAA	147	6	light responsive element
SlGlk53	GT1-motif	GGTTAA	643	6	light responsive element
SlGlk53	GT1-motif	GGTTAA	1626	6	light responsive element
SlGlk53	GT1-motif	GGTTAA	1807	6	light responsive element
SlGlk53	ABRE	ACGTG	141	5	ABA responsive element
SlGlk53	ABRE	ACGTG	1433	5	ABA responsive element
SlGlk54	MBS	CAACTG	1613	6	Drought responsive element
SlGlk54	I-box	atGATAAGGTC	1186	10	Light responsive element
SlGlk54	ATCT-motif	AATCTAATCC	811	9	Light responsive element
SlGlk54	STRE	AGGGG	246	5	Stress responsive element
SlGlk54	STRE	AGGGG	346	5	Stress responsive element
SlGlk54	STRE	AGGGG	696	5	Stress responsive element
SlGlk54	STRE	AGGGG	704	5	Stress responsive element
SlGlk54	GARE-motif	TCTGTTG	1167	7	GA responsive element
SlGlk54	GARE-motif	TCTGTTG	1287	7	GA responsive element
SlGlk54	LTR	CCGAAA	576	6	Low temperature responsive element
SlGlk54	LTR	CCGAAA	1037	6	Low temperature responsive element
SlGlk54	ACE	GACACGTATG	139	9	Light responsive element
SlGlk54	ACE	CTAACGTATT	1177	9	Light responsive element
SlGlk54	Box 4	ATTAAT	951	6	Light responsive element
SlGlk54	LAMP-element	CTTTATCA	1188	8	Light responsive element
SlGlk55	Box 4	ATTAAT	435	6	Light responsive element
SlGlk55	Box 4	ATTAAT	803	6	Light responsive element
SlGlk55	Box 4	ATTAAT	836	6	Light responsive element
SlGlk55	TCT-motif	TCTTAC	157	6	Light responsive element
SlGlk55	MBS	CAACTG	108	6	Drought responsive element
SlGlk55	I-box	gGATAAGGTG	1530	9	Light responsive element
SlGlk55	TGACG/CGTCA-motif	TGACG/CGTCA	1355	5	MeJA responsive element
SlGlk55	ERE	ATTTTAAA	731	8	Ethylene responsive element
SlGlk55	ERE	ATTTTAAA	1313	8	Ethylene responsive element
SlGlk55	ERE	ATTTTAAA	1704	8	Ethylene responsive element
SlGlk55	STRE	AGGGG	398	5	Stress responsive element
SlGlk55	STRE	AGGGG	726	5	Stress responsive element
SlGlk55	STRE	AGGGG	1600	5	Stress responsive element
SlGlk55	ARE	AAACCA	535	6	Anaerobic responsive element
SlGlk55	ARE	AAACCA	736	6	Anaerobic responsive element
SlGlk55	Myb	TAACTG	740	6	Abiotic responsive element
SlGlk55	Myb	TAACTG	1368	6	Abiotic responsive element
SlGlk55	WUN-motif	AAATTACT	618	8	Wound responsive element
SlGlk55	TCA-element	CCATCTTTTT	1817	10	SA responsive element
SlGlk56	ARE	AAACCA	638	6	Anaerobic responsive element
SlGlk56	TCCC-motif	TCTCCCT	177	7	Light responsive element
SlGlk56	STRE	AGGGG	1024	5	Stress responsive element
SlGlk56	ERE	ATTTCATA	995	8	Ethylene responsive element
SlGlk56	MBS	CAACTG	1829	6	Drought responsive element
SlGlk56	LTR	CCGAAA	559	6	Low temperature responsive element
SlGlk56	Box II	TGGTAATAA	693	9	Light responsive element
SlGlk56	GA-motif	ATAGATAA	1666	8	Light responsive element
SlGlk56	TCA-element	CCATCTTTTT	575	9	SA responsive element
SlGlk56	TGA-element	AACGAC	886	6	IAA responsive element
SlGlk56	ABRE	ACGTG	1492	5	ABA responsive element
SlGlk56	TC-rich repeats	GTTTTCTTAC	423	9	Stress responsive element
SlGlk56	WRE3	CCACCT	276	6	Wound responsive element
SlGlk56	WRE3	CCACCT	1615	6	Wound responsive element
SlGlk56	WUN-motif	AAATTACTA	737	9	Wound responsive element
SlGlk56	W box	TTGACC	1745	6	Wound responsive element
SlGlk56	Sp1	GGGCGG	1543	6	light responsive element
SlGlk57	I-box	TGATAATGT	828	9	Light responsive element
SlGlk57	ERE	ATTTCATA	615	8	Ethylene responsive element
SlGlk57	ERE	ATTTCATA	1904	8	Ethylene responsive element
SlGlk57	STRE	AGGGG	156	5	Stress responsive element
SlGlk57	TCCC-motif	TCTCCCT	1764	7	Light responsive element
SlGlk57	ARE	AAACCA	684	6	Anaerobic responsive element
SlGlk57	Box 4	ATTAAT	492	6	Light responsive element
SlGlk57	ABRE	ACGTG	1348	5	ABA responsive element
SlGlk57	P-box	CCTTTTG	435	7	GA responsive element
SlGlk57	W box	TTGACC	249	6	Wound responsive element
SlGlk57	W box	TTGACC	1022	6	Wound responsive element
SlGlk57	W box	TTGACC	1879	6	Wound responsive element
SlGlk57	WUN-motif	AAATTACT	50	8	Wound responsive element
SlGlk57	WRE3	CCACCT	1919	6	Wound responsive element
SlGlk58	Box 4	ATTAAT	559	6	Light responsive element
SlGlk58	Box 4	ATTAAT	943	6	Light responsive element
SlGlk58	ARE	AAACCA	1292	6	Anaerobic responsive element
SlGlk58	ARE	AAACCA	1954	6	Anaerobic responsive element
SlGlk58	ATCT-motif	AATCTAATCC	238	9	Light responsive element
SlGlk58	STRE	AGGGG	69	5	Stress responsive element
SlGlk58	STRE	AGGGG	111	5	Stress responsive element
SlGlk58	STRE	AGGGG	131	5	Stress responsive element
SlGlk58	STRE	AGGGG	147	5	Stress responsive element
SlGlk58	STRE	AGGGG	220	5	Stress responsive element
SlGlk58	TCCC-motif	TCTCCCT	1301	7	Light responsive element
SlGlk58	TCCC-motif	TCTCCCT	1883	7	Light responsive element
SlGlk58	TGACG/CGTCA-motif	TGACG/CGTCA	280	5	MeJA responsive element
SlGlk58	ERE	ATTTTAAA	357	8	Ethylene responsive element
SlGlk58	ERE	ATTTTAAA	576	8	Ethylene responsive element
SlGlk58	ERE	ATTTTAAA	1385	8	Ethylene responsive element
SlGlk58	ERE	ATTTCATA	1600	8	Ethylene responsive element
SlGlk58	ERE	ATTTTAAA	1641	8	Ethylene responsive element
SlGlk58	ERE	ATTTTAAA	1692	8	Ethylene responsive element
SlGlk58	TCT-motif	TCTTAC	549	6	Light responsive element
SlGlk58	MBS	CAACTG	346	6	Drought responsive element
SlGlk58	W box	TTGACC	910	6	Wound responsive element
SlGlk58	W box	TTGACC	1904	6	Wound responsive element
SlGlk58	TCA-element	CCATCTTTTT	315	9	SA responsive element
SlGlk59	ATCT-motif	AATCTAATCC	584	9	Light responsive element
SlGlk59	STRE	AGGGG	460	5	Stress responsive element
SlGlk59	STRE	AGGGG	1745	5	Stress responsive element
SlGlk59	ERE	ATTTTAAA	845	8	Ethylene responsive element
SlGlk59	TATC-box	TATCCCA	302	7	GA responsive element
SlGlk59	TCT-motif	TCTTAC	1302	6	Light responsive element
SlGlk59	MBS	CAACTG	1629	6	Drought responsive element
SlGlk59	I-box	AGATAAGG	632	8	Light responsive element
SlGlk59	I-box	AGATAAGG	728	8	Light responsive element
SlGlk59	Box 4	ATTAAT	718	6	Light responsive element
SlGlk59	Box 4	ATTAAT	964	6	Light responsive element
SlGlk59	GT1-motif	GGTTAA	683	6	light responsive element
SlGlk59	TCA-element	CCATCTTTTT	1359	9	SA responsive element
SlGlk59	TCA-element	TCAGAAGAGG	1552	9	SA responsive element
SlGlk59	TGA-element	AACGAC	492	6	IAA responsive element
SlGlk59	TGA-element	AACGAC	1313	6	IAA responsive element
SlGlk59	ATC-motif	TGCTATCCA	819	9	Light responsive element
SlGlk59	Myb	TAACTG	1691	6	Abiotic responsive element
SlGlk60	Box 4	ATTAAT	169	6	Light responsive element
SlGlk60	Box 4	ATTAAT	418	6	Light responsive element
SlGlk60	Box 4	ATTAAT	482	6	Light responsive element
SlGlk60	Box 4	ATTAAT	721	6	Light responsive element
SlGlk60	Box 4	ATTAAT	826	6	Light responsive element
SlGlk60	Box 4	ATTAAT	1404	6	Light responsive element
SlGlk60	Box 4	ATTAAT	1567	6	Light responsive element
SlGlk60	ARE	AAACCA	1089	6	Anaerobic responsive element
SlGlk60	ARE	AAACCA	1901	6	Anaerobic responsive element
SlGlk60	STRE	AGGGG	1313	5	Stress responsive element
SlGlk60	STRE	AGGGG	1678	5	Stress responsive element
SlGlk60	STRE	AGGGG	1928	5	Stress responsive element
SlGlk60	ERE	ATTTTAAA	143	8	Ethylene responsive element
SlGlk60	ERE	ATTTCATA	651	8	Ethylene responsive element
SlGlk60	ERE	ATTTTAAA	1353	8	Ethylene responsive element
SlGlk60	ERE	ATTTTAAA	1515	8	Ethylene responsive element
SlGlk60	TATC-box	TATCCCA	884	7	GA responsive element
SlGlk60	TCT-motif	TCTTAC	916	6	Light responsive element
SlGlk60	WUN-motif	AAATTACTA	423	9	Wound responsive element
SlGlk60	G-box	TAACACGTAG	466	9	Light responsive element
SlGlk60	MRE	AACCTAA	697	7	Light responsive element
SlGlk60	P-box	CCTTTTG	1716	7	GA responsive element
SlGlk60	GT1-motif	GGTTAA	62	6	light responsive element
SlGlk60	AT1-motif	AATTATTTTTTATT	1573	13	Light responsive element
SlGlk60	ABRE	ACGTG	1056	5	ABA responsive element
SlGlk61	LTR	CCGAAA	752	6	Low temperature responsive element
SlGlk61	Box 4	ATTAAT	962	6	Light responsive element
SlGlk61	TCCC-motif	TCTCCCT	1720	7	Light responsive element
SlGlk61	STRE	AGGGG	133	5	Stress responsive element
SlGlk61	ARE	AAACCA	269	6	Anaerobic responsive element
SlGlk61	GATA-motif	AAGATAAGATT	527	10	Light responsive element
SlGlk61	GATA-motif	AAGGATAAGG	1061	9	Light responsive element
SlGlk61	GATA-motif	AAGGATAAGG	1655	9	Light responsive element
SlGlk61	TCT-motif	TCTTAC	358	6	Light responsive element
SlGlk61	TCT-motif	TCTTAC	1342	6	Light responsive element
SlGlk61	AE-box	AGAAACAA	1640	8	Light responsive element
SlGlk61	ERE	ATTTCATA	558	8	Ethylene responsive element
SlGlk61	TC-rich repeats	ATTCTCTAAC	778	9	Stress responsive element
SlGlk61	W box	TTGACC	1045	6	Wound responsive element
SlGlk61	WRE3	CCACCT	1102	6	Wound responsive element
SlGlk61	WRE3	CCACCT	1777	6	Wound responsive element
SlGlk61	MRE	AACCTAA	1850	7	Light responsive element
SlGlk61	GT1-motif	GGTTAA	22	6	light responsive element
SlGlk61	ABRE	ACGTG	1245	5	ABA responsive element
SlGlk62	WUN-motif	TTATTACAT	269	9	Wound responsive element
SlGlk62	WUN-motif	AAATTTCTT	851	9	Wound responsive element
SlGlk62	WUN-motif	CCATTTCAA	1934	9	Wound responsive element
SlGlk62	W box	TTGACC	604	6	Wound responsive element
SlGlk62	Box 4	ATTAAT	189	6	Light responsive element
SlGlk62	Box 4	ATTAAT	388	6	Light responsive element
SlGlk62	Box 4	ATTAAT	699	6	Light responsive element
SlGlk62	Box 4	ATTAAT	1098	6	Light responsive element
SlGlk62	Box 4	ATTAAT	1789	6	Light responsive element
SlGlk62	O2-site	GATGATGTGG	1857	9	Zein responsive element
SlGlk62	TGA-element	AACGAC	1704	6	IAA responsive element
SlGlk62	AE-box	AGAAACAA	19	8	Light responsive element
SlGlk62	ERE	ATTTTAAA	318	8	Ethylene responsive element
SlGlk62	ERE	ATTTTAAA	707	8	Ethylene responsive element
SlGlk62	ERE	ATTTTAAA	1019	8	Ethylene responsive element
SlGlk62	ERE	ATTTTAAA	1145	8	Ethylene responsive element
SlGlk62	ERE	ATTTTAAA	1445	8	Ethylene responsive element
SlGlk62	ERE	ATTTTAAA	1452	8	Ethylene responsive element
SlGlk62	ERE	ATTTTAAA	1475	8	Ethylene responsive element
SlGlk62	TGACG/CGTCA-motif	TGACG/CGTCA	728	5	MeJA responsive element
SlGlk62	TCA-element	CCATCTTTTT	1686	9	SA responsive element
SlGlk62	STRE	AGGGG	1437	5	Stress responsive element
SlGlk62	GT1-motif	GGTTAA	861	6	light responsive element
SlGlk63	TC-rich repeats	GTTTTCTTAC	131	9	Stress responsive element
SlGlk63	G-box	CACGAC	984	6	Light responsive element
SlGlk63	WUN-motif	AAATTACT	492	8	Wound responsive element
SlGlk63	W box	TTGACC	1222	6	Wound responsive element
SlGlk63	P-box	CCTTTTG	363	7	GA responsive element
SlGlk63	P-box	CCTTTTG	1920	7	GA responsive element
SlGlk63	Box II	TGGTAATAA	1525	9	Light responsive element
SlGlk63	ABRE	ACGTG	268	5	ABA responsive element
SlGlk63	O2-site	GTTGACGTGA	522	9	Zein responsive element
SlGlk63	Box 4	ATTAAT	47	6	Light responsive element
SlGlk63	Box 4	ATTAAT	216	6	Light responsive element
SlGlk63	Box 4	ATTAAT	240	6	Light responsive element
SlGlk63	Box 4	ATTAAT	252	6	Light responsive element
SlGlk63	Box 4	ATTAAT	260	6	Light responsive element
SlGlk63	Box 4	ATTAAT	407	6	Light responsive element
SlGlk63	sbp-CMA1c	CTTTATCTCTTCCA	1207	13	Light responsive element
SlGlk63	STRE	AGGGG	182	5	Stress responsive element
SlGlk63	STRE	AGGGG	1562	5	Stress responsive element
SlGlk63	STRE	AGGGG	1642	5	Stress responsive element
SlGlk63	box S	AGCCACC	224	7	Wound responsive element
SlGlk63	ARE	AAACCA	509	6	Anaerobic responsive element
SlGlk63	ARE	AAACCA	1711	6	Anaerobic responsive element
SlGlk63	MBS	CAACTG	1445	6	Drought responsive element
SlGlk63	MBS	CAACTG	1452	6	Drought responsive element
SlGlk63	MBS	CAACTG	1854	6	Drought responsive element
SlGlk63	TCT-motif	TCTTAC	601	6	Light responsive element
SlGlk63	ERE	ATTTTAAA	884	8	Ethylene responsive element
SlGlk64	Box 4	ATTAAT	60	6	Light responsive element
SlGlk64	Box 4	ATTAAT	72	6	Light responsive element
SlGlk64	Box 4	ATTAAT	273	6	Light responsive element
SlGlk64	Box 4	ATTAAT	349	6	Light responsive element
SlGlk64	Box 4	ATTAAT	356	6	Light responsive element
SlGlk64	Box 4	ATTAAT	370	6	Light responsive element
SlGlk64	Box 4	ATTAAT	541	6	Light responsive element
SlGlk64	Box 4	ATTAAT	642	6	Light responsive element
SlGlk64	Box 4	ATTAAT	961	6	Light responsive element
SlGlk64	Box 4	ATTAAT	1600	6	Light responsive element
SlGlk64	Box 4	ATTAAT	1778	6	Light responsive element
SlGlk64	ARE	AAACCA	1895	6	Anaerobic responsive element
SlGlk64	STRE	AGGGG	51	5	Stress responsive element
SlGlk64	STRE	AGGGG	1488	5	Stress responsive element
SlGlk64	ERE	ATTTCATA	1366	8	Ethylene responsive element
SlGlk64	ERE	ATTTTAAA	1639	8	Ethylene responsive element
SlGlk64	LAMP-element	CTTTATCA	118	8	Light responsive element
SlGlk64	WRE3	CCACCT	680	6	Wound responsive element
SlGlk64	W box	TTGACC	223	6	Wound responsive element
SlGlk64	WUN-motif	AAATTTCTT	1978	9	Wound responsive element
SlGlk64	ACA-motif	ATCGACAGCCATT	88	12	Light responsive element
SlGlk64	ACA-motif	ATCGACAGCCATT	159	12	Light responsive element
SlGlk64	Sp1	GGGCGG	249	6	light responsive element
SlGlk64	TGA-element	AACGAC	285	6	IAA responsive element
SlGlk64	MBSI	aaaAaaC(G/C)GTTA	198	10.5	Flavonoid resposive element
SlGlk64	ABRE	ACGTG	870	5	ABA responsive element
SlGlk64	ABRE	ACGTG	984	5	ABA responsive element
SlGlk65	4cl-CMA1c	CTTTACCAACCCCC	1695	13	light responsive element
SlGlk65	chs-CMA1a	TTACTTAA	1322	8	Light responsive element
SlGlk65	chs-CMA1a	TTACTTAA	1346	8	Light responsive element
SlGlk65	TGA-element	AACGAC	548	6	IAA responsive element
SlGlk65	TGA-element	AACGAC	1784	6	IAA responsive element
SlGlk65	WUN-motif	AAATTACTA	677	9	Wound responsive element
SlGlk65	DRE	TACCGACAT	1672	9	Abiotic responsive element
SlGlk66	LTR	CCGAAA	1608	6	Low temperature responsive element
SlGlk66	MBS	CAACTG	23	6	Drought responsive element
SlGlk66	MBS	CAACTG	434	6	Drought responsive element
SlGlk66	Box 4	ATTAAT	401	6	Light responsive element
SlGlk66	Box 4	ATTAAT	548	6	Light responsive element
SlGlk66	Box 4	ATTAAT	820	6	Light responsive element
SlGlk66	Box 4	ATTAAT	1267	6	Light responsive element
SlGlk66	Box 4	ATTAAT	1770	6	Light responsive element
SlGlk66	Box 4	ATTAAT	1973	6	Light responsive element
SlGlk66	ATCT-motif	AATCTAATCC	1898	9	Light responsive element
SlGlk66	AE-box	AGAAACAA	1960	8	Light responsive element
SlGlk66	I-box	gGATAAGGTG	1180	9	Light responsive element
SlGlk66	TGACG/CGTCA-motif	TGACG/CGTCA	248	5	MeJA responsive element
SlGlk66	TGACG/CGTCA-motif	TGACG/CGTCA	1224	5	MeJA responsive element
SlGlk66	GATA-motif	GATAGGA	95	7	Light responsive element
SlGlk66	GATA-motif	GATAGGA	367	7	Light responsive element

## Sheet: Sheet1
Table S7 Cis-regulatory elements of G2-like genes in tomato
Motif Name Gene Name	3-AF1 binding site	4cl-CMA1c	AAAC-motif	ABRE	ACA-motif	ACE	AE-box	ARE	AT1-motif	ATC-motif	ATCT-motif	AuxRE	AuxRR-core	Box 4	Box II	box S	chs-CMA1a	chs-CMA2a	chs-Unit 1 m1	DRE	DRE core	ERE	GA-motif	Gap-box	GARE-motif	GATA-motif	G-box	GC-motif	GT1-motif	I-box	LAMP-element	LTR	MBS	MBSI	MRE	Myb	O2-site	P-box	Pc-CMA2b	sbp-CMA1c	Sp1	STRE	TATC-box	TCA-element	TCCC-motif	TC-rich repeats	TCT-motif	TGA-box	TGACG/CGTCA-motif
SlGlk1			1			1		4	1					2					1				1						1				1									1		1			1
SlGlk2				2						1				1		1	1							1								3	1		1	2						1				3	2
SlGlk3				2				2						2								4							2				1			1						2					1	1
SlGlk4				2				5					1									4														3						2		1	1		1		1
SlGlk5				1		1	2	3						3								1				1			1			1	1			1						1					3
SlGlk6											1			5			1					3	1						3					1		1						3		3	1		1
SlGlk7	1						1							5			1					2				1			3	1			1	1		1						1		1					2
SlGlk8	2													4								2	1						2			2			1	1									1	2			2
SlGlk9	1					1	1	1			1			7			1					3	1						3		1	1		1		2						1		2	1		1		1
SlGlk10				1				1						4								2	1		1	1	2		3			1				1						2	3				1		1
SlGlk11				1							1			11							1	4			1				1							1		1									1
SlGlk12				1			2	1			1			2			1					4				1	1										1	1				1		1	1	1
SlGlk13				2			1							8									1			1											1					6	1				2
SlGlk14				1		1		1						4				1				3							2	1																			4
SlGlk15				2				2						1								2							1		1		2					5				2					1
SlGlk16	1			2				2						6								1														3	1	1				2				2
SlGlk17							1	2						2		1						3				1			1				2			1						2		3	1				2
SlGlk18				2		1		1					1									2	1					1	1			1	2		1	2						4	1				1
SlGlk19				1										7								4			2				1						1									1		1
SlGlk20				1				2						2								2				1				1		2					1	1				4		1		1	1
SlGlk21								1	1					10				1				2				1			1						1							2				1	2		1
SlGlk22	1			2										3				1				4	1						1							2					2	9
SlGlk23				1						1	1			3	1		1	1								1			1						1							3		1			1
SlGlk24				1				2					1	12								3																						1
SlGlk25				1				1						1											1					1			2				1	1				2		1					2
SlGlk26				3									1	5								8													1							2		3		1	2
SlGlk27				2			1	3						1								1			1	1			1	1		1	2			2						2					2
SlGlk28				3			1						1	3								3							1	1		1					1									1			1
SlGlk29					1									4								1							1				1		1												1		1
SlGlk30				1			1	2						4								1				1									1	1						3		1	2	1			1
SlGlk31	1		1	3			1				1			3								2	2			1			4	1							2					5					2
SlGlk32				2		1	1	1						1								1	1				1		2	2			1			1	1					1					1		1
SlGlk33				5		1		2				1		3								3					1		2			1	1									2		1			1	1	1
SlGlk34																	1					2
SlGlk35				1									1	4								2	2			1	2		1	1		2	1		2	1							1			2
SlGlk36								2	1					6								3	1		1				2									2											2
SlGlk37				1			2	1					1	8								2							3			1							1			1		1
SlGlk38				4		1		2			1			5								6	2	1		1			1			1						1				2			1		2
SlGlk39				4										4								6												1		1						3			1				1
SlGlk40				3							1			3		1								1	1																	4					1
SlGlk41								1						6								2				1			1			1						1				3				1	2
SlGlk42				2		1		2			1			1		1									3	1							1		1	3						3		2	1	1	2
SlGlk43				1			1	3						7								2				1				2			1		1	2	2					1		2	1				3
SlGlk44							1	2						2		1						1			1				1				1		2	2		1				3		2		1	1
SlGlk45						1	3	1						4								3				1			2													2					1
SlGlk46														2								3	1		1	2			2													2					2		1
SlGlk47				1				2						4								1			1	1						2			1			1				3		2			3		1
SlGlk48				2			1	3						1								1					1		1			1						1				2			1		1
SlGlk49								3						2								1				1	1	1	3		1	1				2	1	1				1					3
SlGlk50							1			1				3								4			1				2	1					1									1					3
SlGlk51				1			3	3														1	1						1	1			4			2												1
SlGlk52			1				1	4					1													3				1			2				1					2
SlGlk53				2				1						1								2		3	1		1		4	1								2				1			1		2
SlGlk54						2					1			1											2					1	1	2	1									4
SlGlk55								2						3								3								1			1			2						3		1			1		1
SlGlk56				1				1							1							1	1									1	1								1	1		1	1	1
SlGlk57				1				1						1								2								1								1				1			1
SlGlk58								2			1			2								6											1									5		1	2		1		1
SlGlk59										1	1			2								1							1	2			1			1						2	1	2			1
SlGlk60				1				2	1					7								4					1		1						1			1				3	1				1
SlGlk61				1			1	1						1								1				3			1			1			1							1			1	1	2
SlGlk62							1							5								7							1								1					1		1					1
SlGlk63				1				2						6	1	1						1					1						3				1	2		1		3				1	1
SlGlk64				2	2			1						11								2									1			1							1	2
SlGlk65		1															2			1
SlGlk66							1				1			6												2				1		1	2																2
Total Number	7	1	3	74	3	12	29	81	4	4	13	1	8	237	3	6	9	4	1	1	1	145	19	6	18	30	12	2	67	22	5	28	38	5	19	42	15	24	1	1	4	125	8	38	19	22	56	3	37
[truncated: 5 more columns]
