# Supplementary material for: Genome-wide identification of Tomato Golden 2-Like transcription factors and abiotic stress related members screening
Source: BMC Plant Biol. 2022 Feb 23;22:82. doi: 10.1186/s12870-022-03460-9 (PMC8864820; doi:10.1186/s12870-022-03460-9)
Supplement: Supplementary file 8 — Additional file 8. [file 12870_2022_3460_MOESM8_ESM.xlsx]

## Sheet: Sheet4
Table S8 The FPMK of G2-like genes in tomato under three different abiotic stresses
Cold				Drought				Salt
Gene Name	Treatment Time			Gene Name	Treatment Time			Gene Name	Treatment Time
	0h	4h	12h		0h	3h	6h		0h	2h	8h
SlGlk1	7.47333	7.70667	8.50667	SlGlk1	3.94333	8.68333	7.61667	SlGlk1	5.86	9.46333	12.0333
SlGlk3	50.0267	62.7067	80.9433	SlGlk3	27.9633	33.2833	24.2267	SlGlk3	44.1433	14.2867	46.98
SlGlk11	1.89	3.73333	7.11	SlGlk5	1.33	0.66	0.563333	SlGlk11	6.93	13.2967	6.21667
SlGlk14	25.9567	34.6033	29.1833	SlGlk11	4.11	3.14333	1.12333	SlGlk14	25.67	14.4367	17.03
SlGlk16	10.4333	11.8867	14.12	SlGlk14	22.6867	9.42	7.33667	SlGlk16	15.41	13.8033	12.1167
SlGlk20	18.4867	5.38	8.41	SlGlk16	8.02333	15.88	15.11	SlGlk20	13.59	4.85667	7.16
SlGlk21	20.7633	11.4833	13.0967	SlGlk20	32.6367	28.3367	10.07	SlGlk21	8.33667	9.94	22.79
SlGlk22	90.13	65.4833	96.36	SlGlk21	11.16	31.97	24.5233	SlGlk22	145.027	55.0733	98.6967
SlGlk23	4.16333	3.98	3.02	SlGlk22	79.1433	38.3633	40.07	SlGlk23	4.52667	2.20667	3.81
SlGlk24	35.5667	30.17	40.24	SlGlk23	2.03667	4.60667	3.28	SlGlk24	31.13	84.03	62.0867
SlGlk25	20.1067	23.9233	20.87	SlGlk24	24.48	19.7133	24.0233	SlGlk25	84.1033	23.3767	42.0833
SlGlk26	2.61333	13.2433	13.0967	SlGlk25	65.2167	59.3867	52.7933	SlGlk26	0.123333	0.14	1.74667
SlGlk27	10.11	10.5233	10.4533	SlGlk26	0.203333	13.7833	1.15667	SlGlk27	16.08	12.08	20.45
SlGlk28	1.17667	1.94	2.17667	SlGlk27	11.5167	20.1833	16.6	SlGlk28	3.88333	2.94	2.01667
SlGlk29	23.5967	21.2	15.1733	SlGlk28	4.48333	1.3	1.16667	SlGlk29	33.7933	12.1667	41.3833
SlGlk30	3.44	3.41	2.51667	SlGlk29	21.6567	42.85	23.78	SlGlk31	22.0533	4.49	6.31
SlGlk31	6.02667	8.72	8.5	SlGlk30	1.64333	3.56	4.99667	SlGlk32	8.57333	5.09333	16.6933
SlGlk32	12.2967	23.5633	19.9867	SlGlk31	5.45	3.17	3.40667	SlGlk33	6.35667	4.34	8.80333
SlGlk33	7.55	9.15333	10.1167	SlGlk32	1.22667	25.9433	4.86	SlGlk36	182.213	12.2067	15.6633
SlGlk36	56.4867	91.0567	78.1233	SlGlk33	6.13	9.54667	6.26333	SlGlk37	7.84333	3.87667	4.24
SlGlk37	3.28667	3.45	5.35667	SlGlk36	27.7633	0.963333	5.35667	SlGlk38	0.68	5.00667	1.35
SlGlk39	2.73333	2.26333	2.60333	SlGlk37	1.14	4.12667	2.42333	SlGlk39	7.18667	4.73333	4.18
SlGlk40	13.8067	14.3433	17.7567	SlGlk38	3.10333	1.74	1.35	SlGlk40	16.6867	7.83333	77.04
SlGlk41	3.72333	3.65	2.88667	SlGlk39	4.89333	3.07333	4.42333	SlGlk41	2.03667	1.11	1.66333
SlGlk44	27.9	30.0533	31.63	SlGlk40	9.27667	11.87	8.55333	SlGlk44	47.98	83.6767	119.727
SlGlk45	1.28	0.91	1.28	SlGlk41	3.29333	1.76667	1.41	SlGlk45	2.15667	0.126667	1.03667
SlGlk46	2.15333	1.44	1.28	SlGlk44	39.6733	79.8633	70.95	SlGlk46	42.2933	1.63667	0.973333
SlGlk49	42.8067	30.5267	33.33	SlGlk46	5.94	0	0.166667	SlGlk49	28.9067	13.67	36.4867
SlGlk50	4.61667	3.82	3.17	SlGlk49	21.0833	25.9267	33.0133	SlGlk50	2.07667	2.04	21.3267
SlGlk52	5.20667	4.00667	3.57667	SlGlk50	1.41667	2.31333	1.82333	SlGlk52	5.70333	1.12333	2.95333
SlGlk53	15.7933	16.1933	14	SlGlk52	2.94333	1.77	2.27	SlGlk53	14.3433	7.69667	2.67667
SlGlk54	11.0867	20.3667	23.1433	SlGlk53	14.86	15.3133	9.47	SlGlk54	17.5833	2.28333	3.77
SlGlk55	4.20333	2.23333	2.5	SlGlk54	6.85	6.42333	3.57333	SlGlk55	6.14333	0.89	3
SlGlk56	26.23	26.8967	23.1	SlGlk55	2.44667	2.59667	1.28333	SlGlk56	26.7567	28.7767	37.9533
SlGlk59	34.55	48.0967	49.16	SlGlk56	20.9967	35.72	31.0733	SlGlk59	60.8367	59.6933	52.5133
SlGlk61	13.2167	14.02	11.7733	SlGlk59	55.17	67.2933	65.09	SlGlk61	13.87	1.71	3.61667
SlGlk62	21.78	6.04667	11.0267	SlGlk60	0.506667	1.08667	0.423333	SlGlk62	95.6633	0.436667	5.58333
SlGlk63	12.9633	11.1033	9.99333	SlGlk61	1.82333	10.34	16.3933	SlGlk63	12.26	5.35333	14.5733
SlGlk64	16.4367	12.67	10.42	SlGlk62	8.64333	1.51333	3.79333	SlGlk64	11.93	4.2	6.78
SlGlk65	42.12	34.0733	30.96	SlGlk63	8.7	9.97667	7.58	SlGlk65	25.6	15.9767	12.2733
				SlGlk64	15.4333	18.9167	15.3467	SlGlk30	1.08667	0.233333	0.44
				SlGlk65	16.8033	6.8	12.8867
