# Supplementary material for: Genome-wide identification of Tomato Golden 2-Like transcription factors and abiotic stress related members screening
Source: BMC Plant Biol. 2022 Feb 23;22:82. doi: 10.1186/s12870-022-03460-9 (PMC8864820; doi:10.1186/s12870-022-03460-9)
Supplement: Supplementary file 9 — Additional file 9. [file 12870_2022_3460_MOESM9_ESM.xlsx]

## Sheet: Sheet2
Table S9 KEGG pathway of DEGs of G2-like genes in tomato
Pathway ID	Pathway Name	Level 1	Level 2	Term Candidate Gene Num	Total Candidate Gene Num	Term Gene Num	Total Gene Num	Rich Ratio	P value	Q value
ko04075	Plant hormone signal transduction	Environmental Information Processing	Signal transduction	35	35	833	11706	0.0420168	3.43391e-41	2.40374e-40
ko00220	Arginine biosynthesis	Metabolism	Amino acid metabolism	4	35	74	11706	0.0540541	6.6417e-05	0.000154973
ko00250	Alanine, aspartate and glutamate metabolism	Metabolism	Amino acid metabolism	4	35	200	11706	0.02	0.00286017	0.0050053
